# Supplementary material for: Seasonal and spatial pattern of dissolved organic matter biodegradation and photodegradation in boreal humic waters
Source: Copernicus journal article supplement (doi:10.5194/bg-21-5725-2024), 2024-12-20
Supplement: Supplementary file 1 [file bg-21-5725-2024-supplement.pdf]

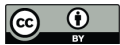

*Supplement of*

## **Seasonal and spatial pattern of dissolved organic matter biodegradation and photodegradation in boreal humic waters**

**Artem V. Chupakov et al.**

*Correspondence to:* Oleg S. Pokrovsky ([oleg.pokrovsky@get.omp.eu](mailto:oleg.pokrovsky@get.omp.eu))

The copyright of individual parts of the supplement might differ from the article licence.

## SUPPLEMENTARY MATERIAL

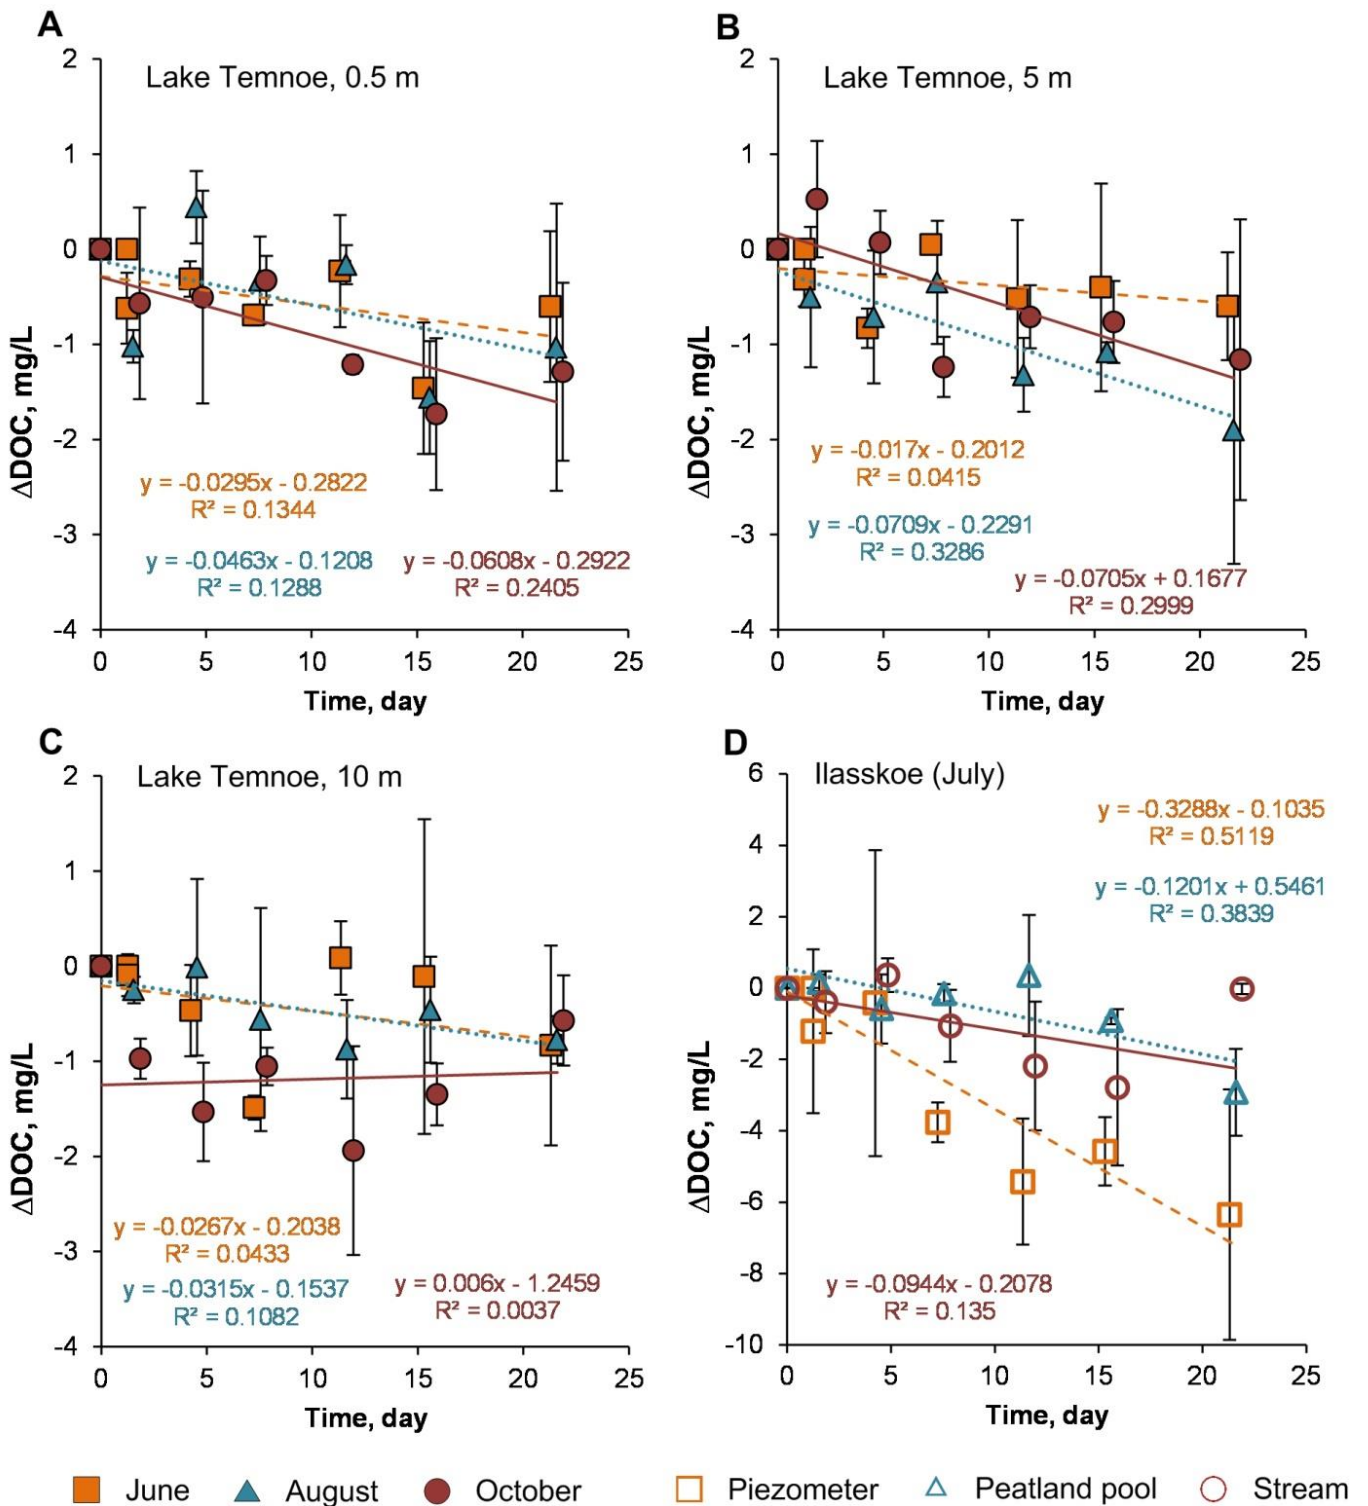

**Fig. S1.** The change of DOC concentration over time in biodegradation experiments. The error bars represent 1 s.d. of duplicates unless within the symbol size. Lake Temnoe 0.5 m (A), 5 m (B) and 10 m (C) in June (squares), August (triangles) and October (circles). Ilasskoe continuum in July (D) includes piezometer (open squares), peatland pool Severnoe (open triangles) and stream Chernyi (open circles)

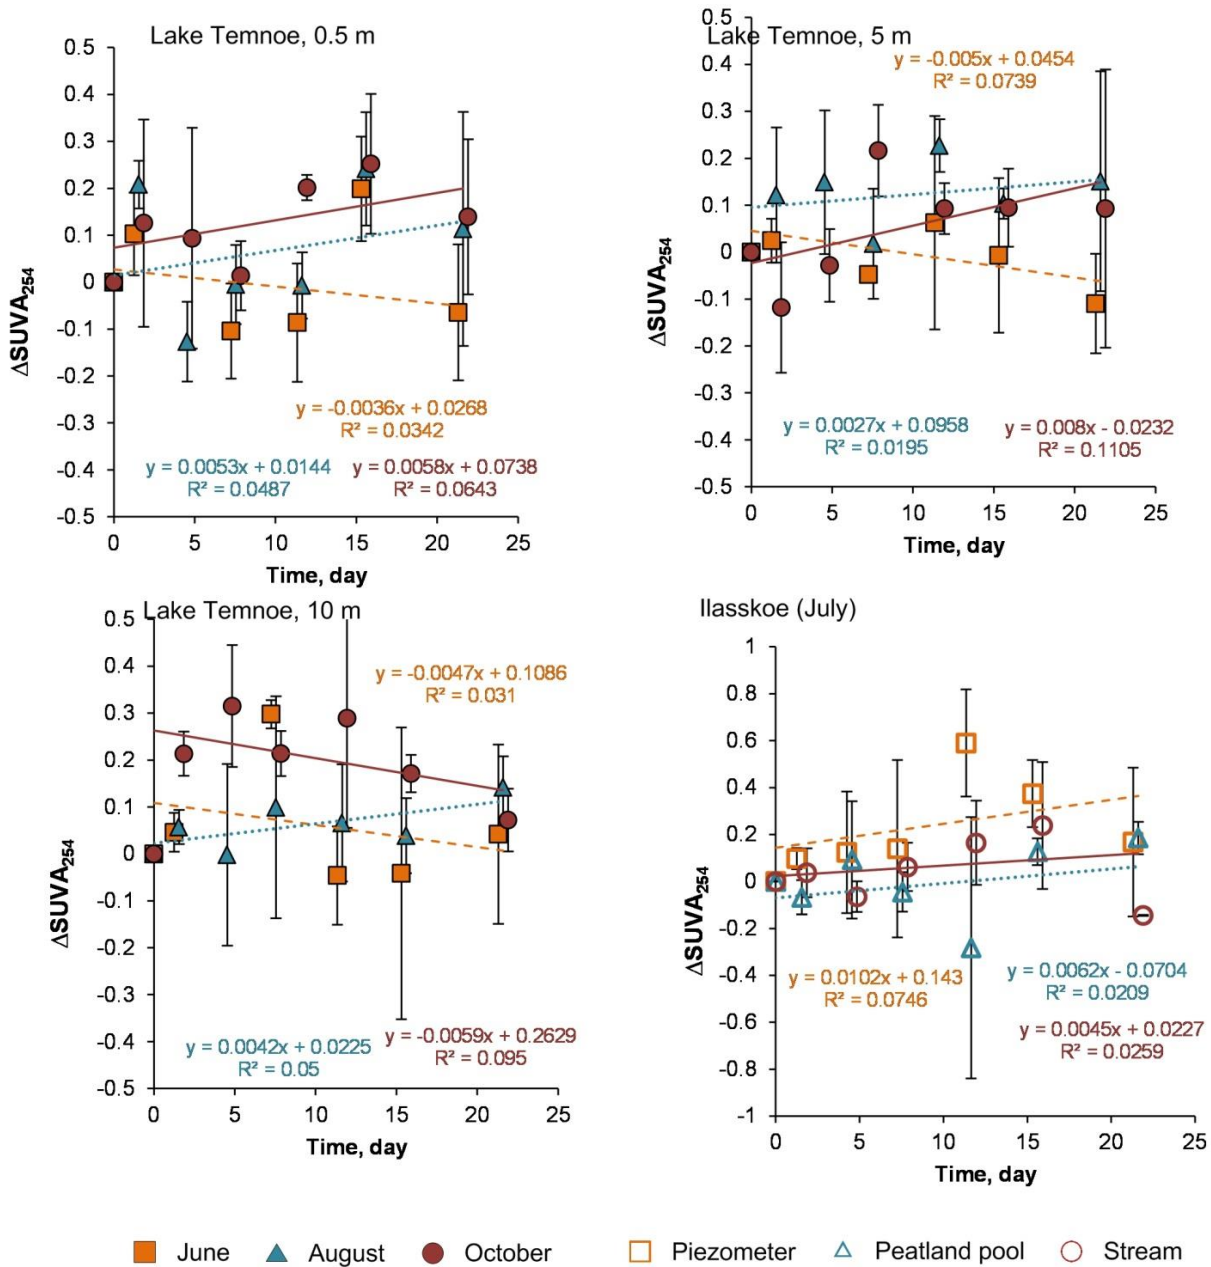

**Fig. S2.** The change of  $SUVA_{254}$  over time in bio-degradation experiments. The error bars represent 1 s.d. of duplicates. Lake Temnoe 0.5 m (A), 5 m (B) and 10 m (C) in June (squares), August (triangles) and October (circles). Illasskoe continuum in July (D) includes piezometer (open squares), peatland pool Severnoe (open triangles) and stream Chernyi (open circles)

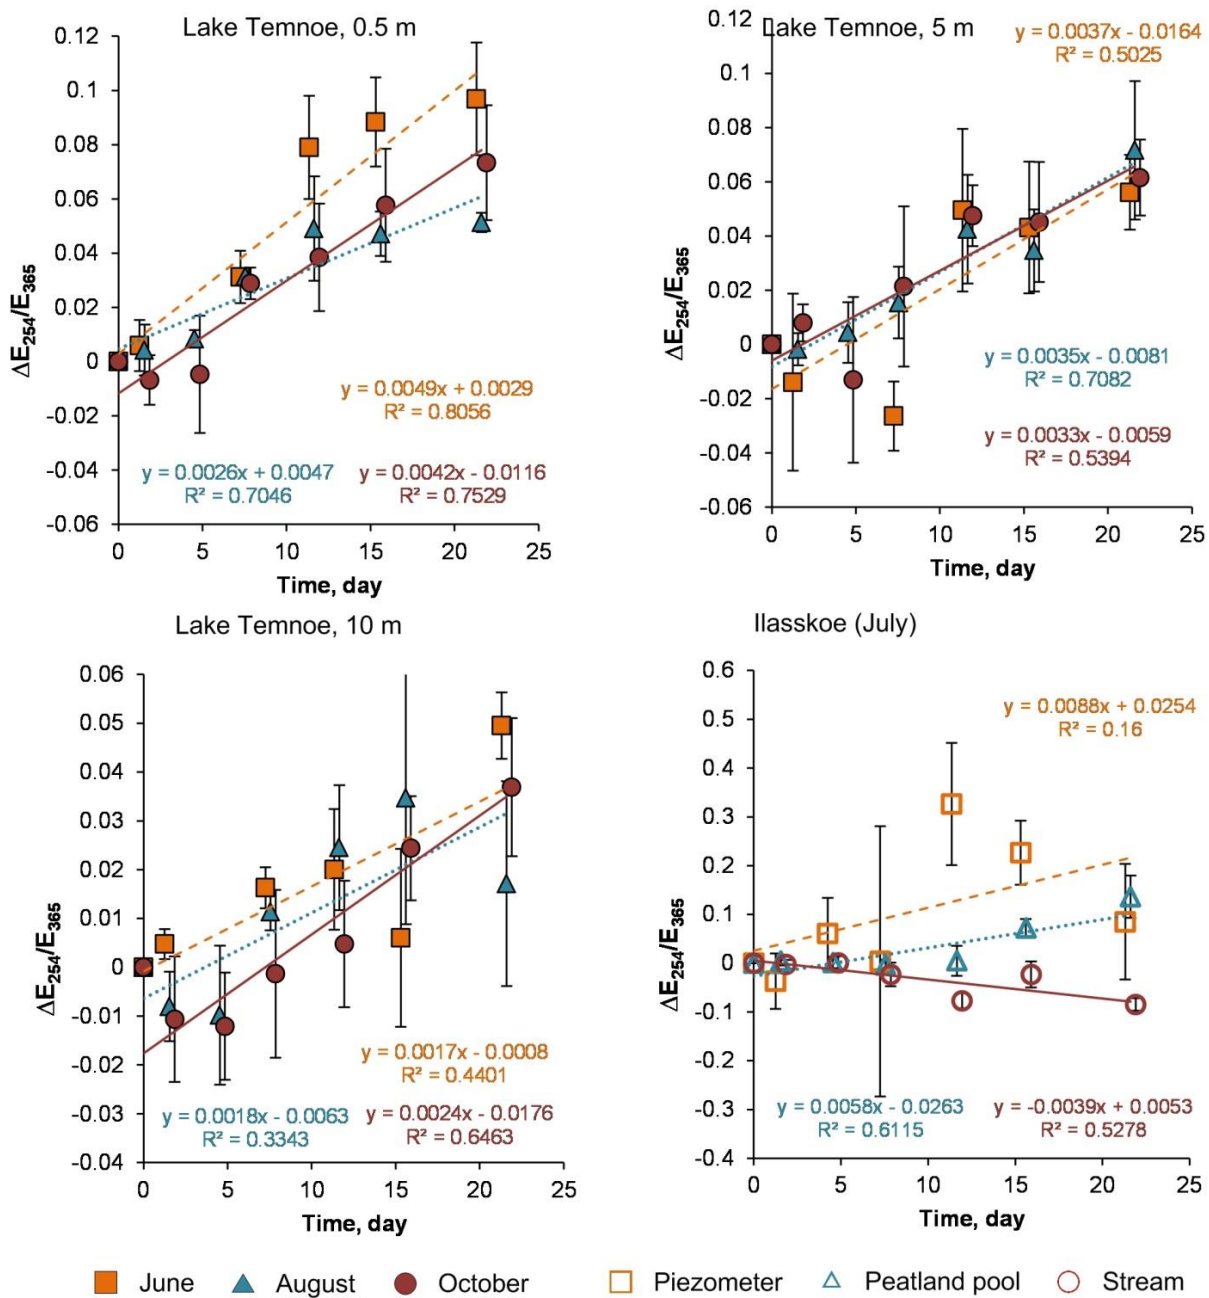

**Fig. S3.** The change of optical ratios ( $E_{254}/E_{365}$ ) over time in bio-degradation experiments. Lake Temnoe 0.5 m (A), 5 m (B) and 10 m (C) in June (squares), August (triangles) and October (circles). Ilasskoe continuum in July (D) includes piezometer (squares), peatland pool Severnoe (triangles) and stream Chernyi (circles)

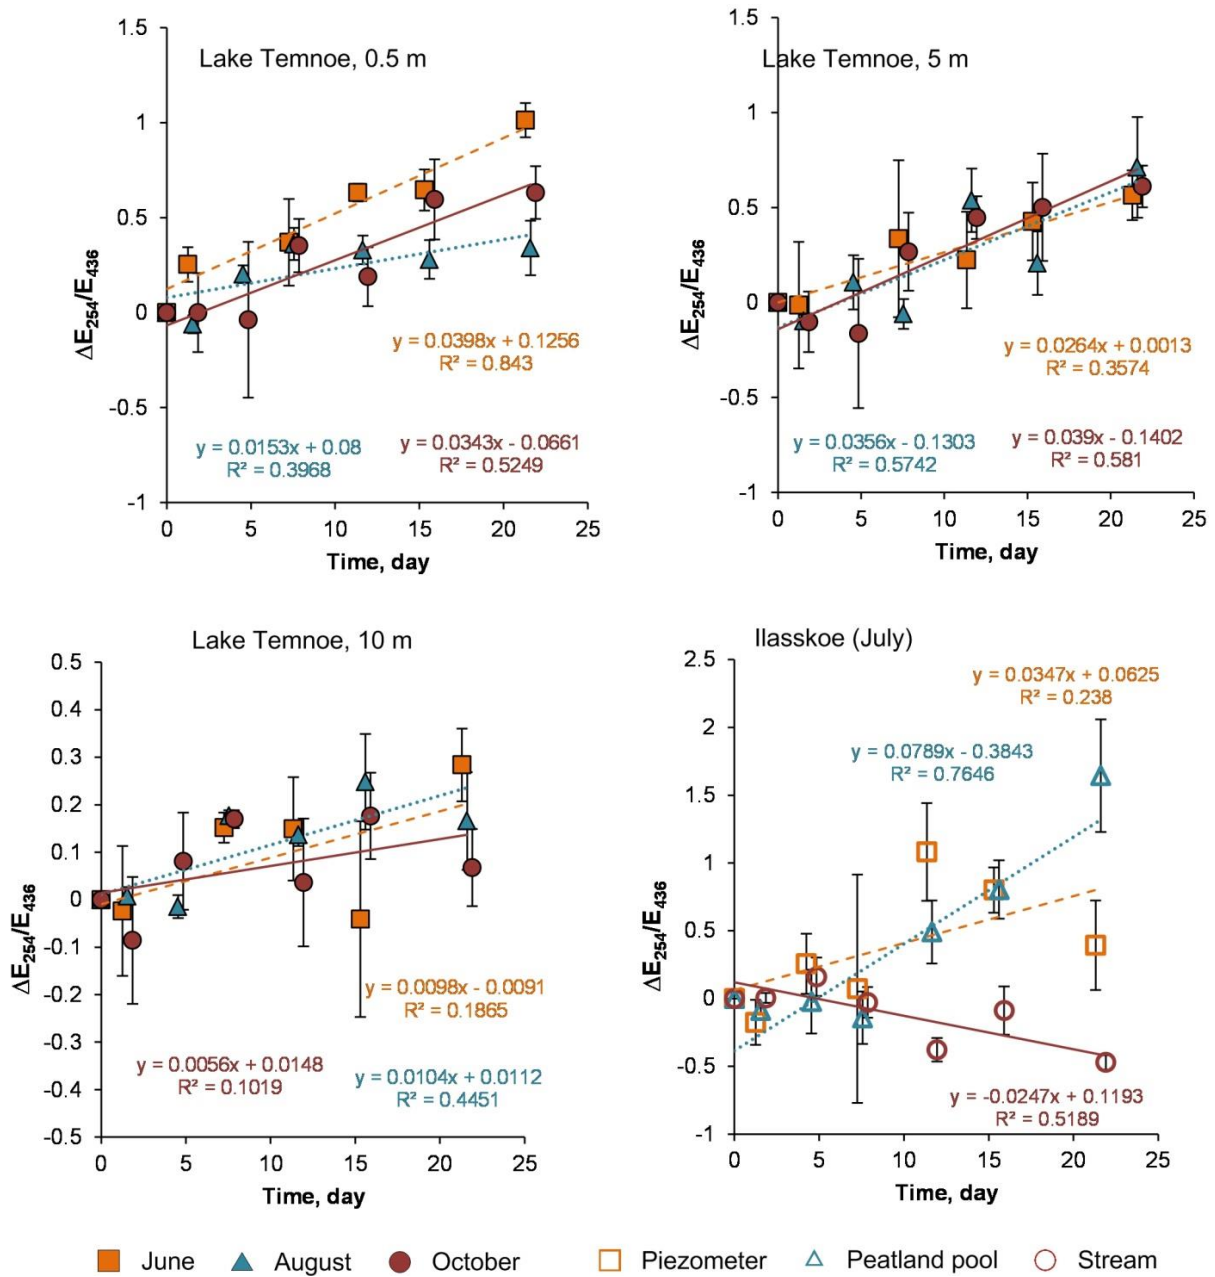

**Fig. S3**, continued. The change of optical ratios ( $E_{254}/E_{436}$ ) over time in bio-degradation experiments. Lake Temnoe 0.5 m (A), 5 m (B) and 10 m (C) in June (squares), August (triangles) and October (circles). Ilasskoe continuum in July (D) includes piezometer (squares), peatland pool Severnoe (triangles) and outlet stream Chernyi (circles)

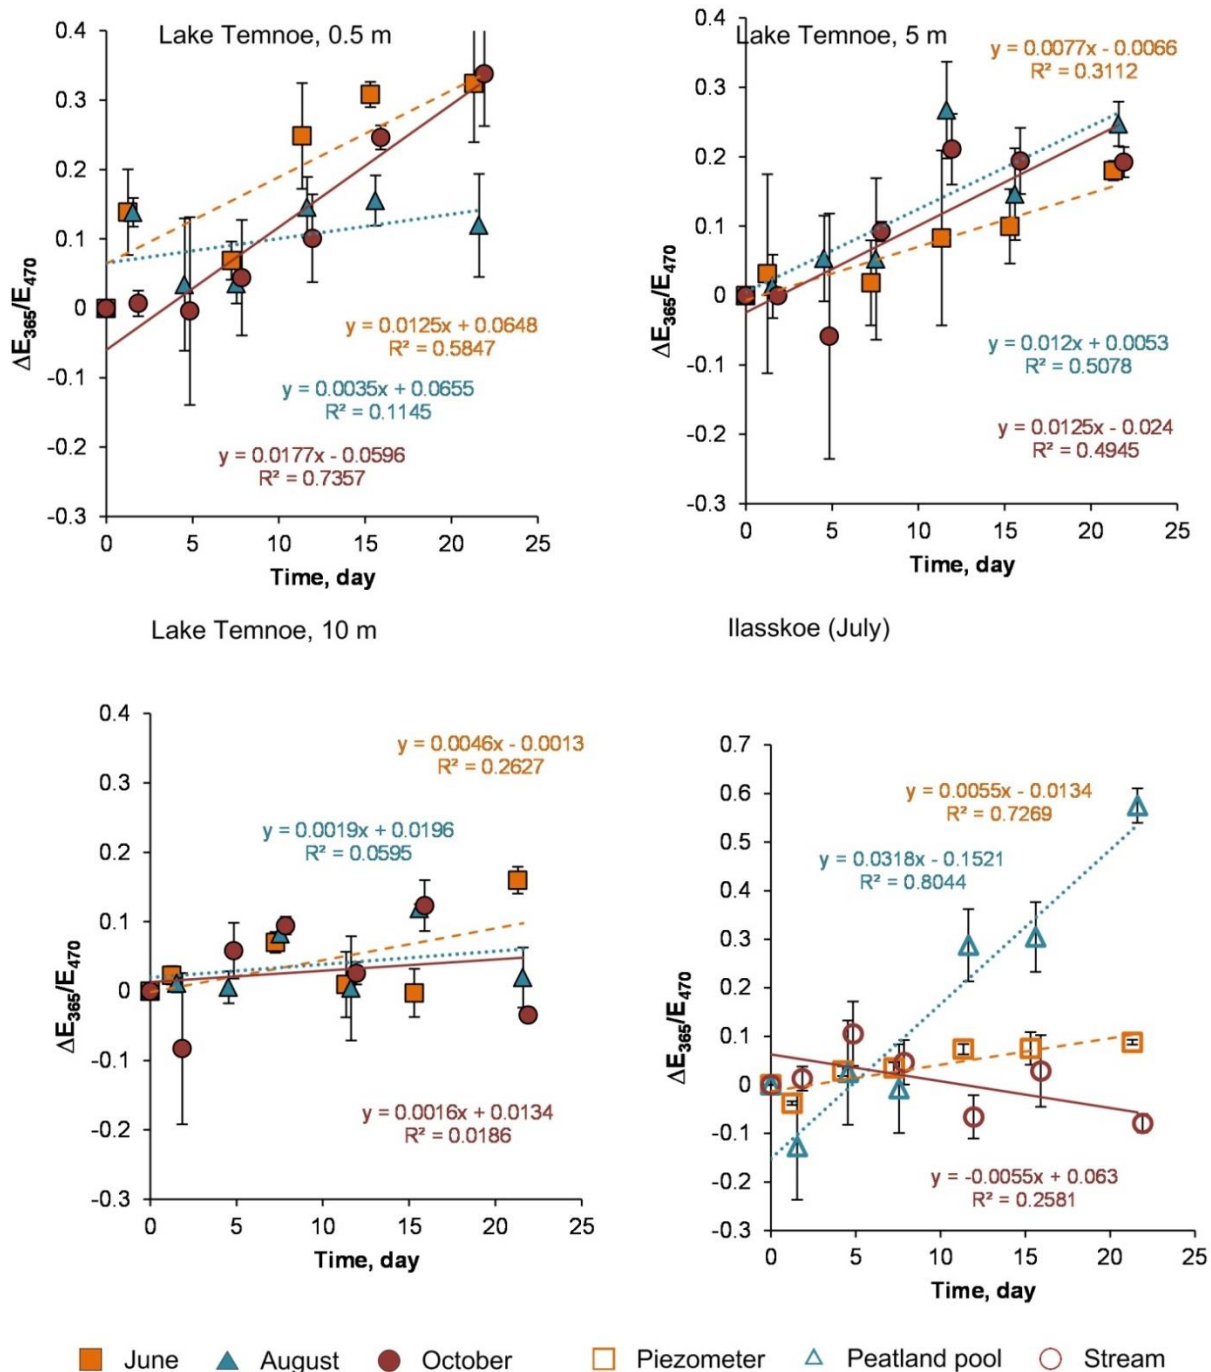

**Fig. S3**, continued. The change of optical ratios ( $E_{365}/E_{470}$ ) over time in bio-degradation experiments. Lake Temnoe 0.5 m (A), 5 m (B) and 10 m (C) in June (squares), August (triangles) and October (circles). Illasskoe continuum in July (D) includes piezometer (squares), peatland pool Severnoe (triangles) and outlet stream Chernyi (circles)



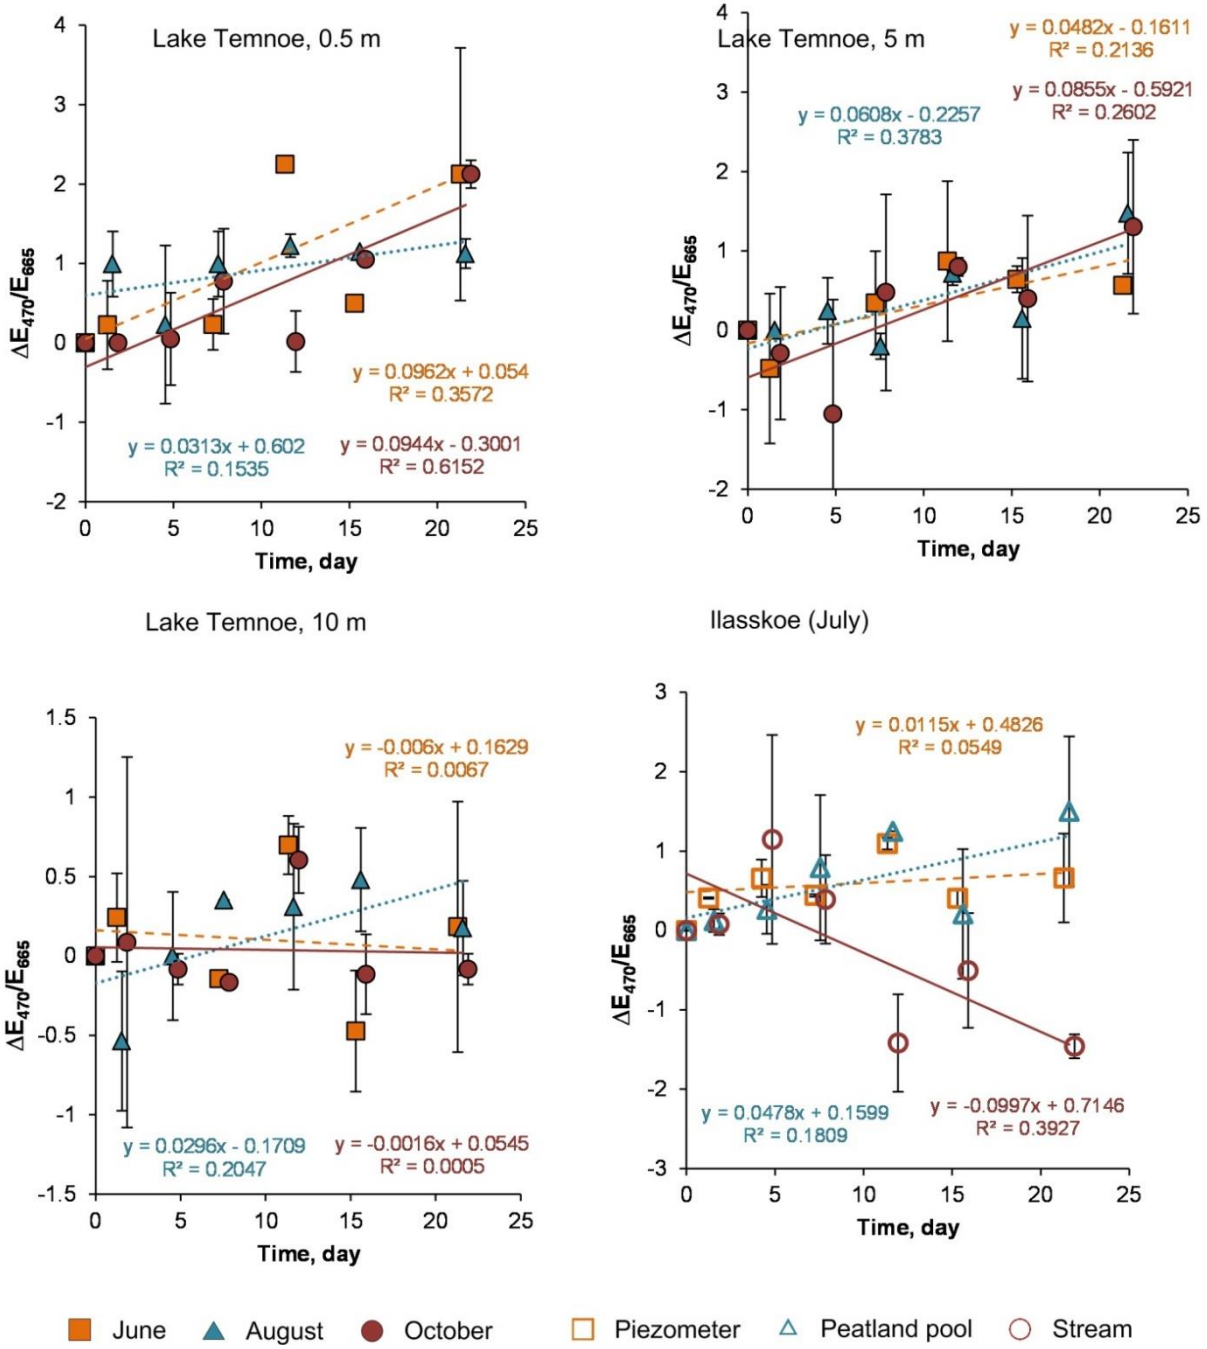

**Fig. S3**, continued. The change of optical ratios ( $E_{470}/E_{665}$ ) over time in bio-degradation experiments. Lake Temnoe 0.5 m (A), 5 m (B) and 10 m (C) in June (squares), August (triangles) and October (circles). Illasskoe continuum in July (D) includes piezometer (squares), peatland pool Severnoe (triangles) and outlet stream Chernyi (circles)

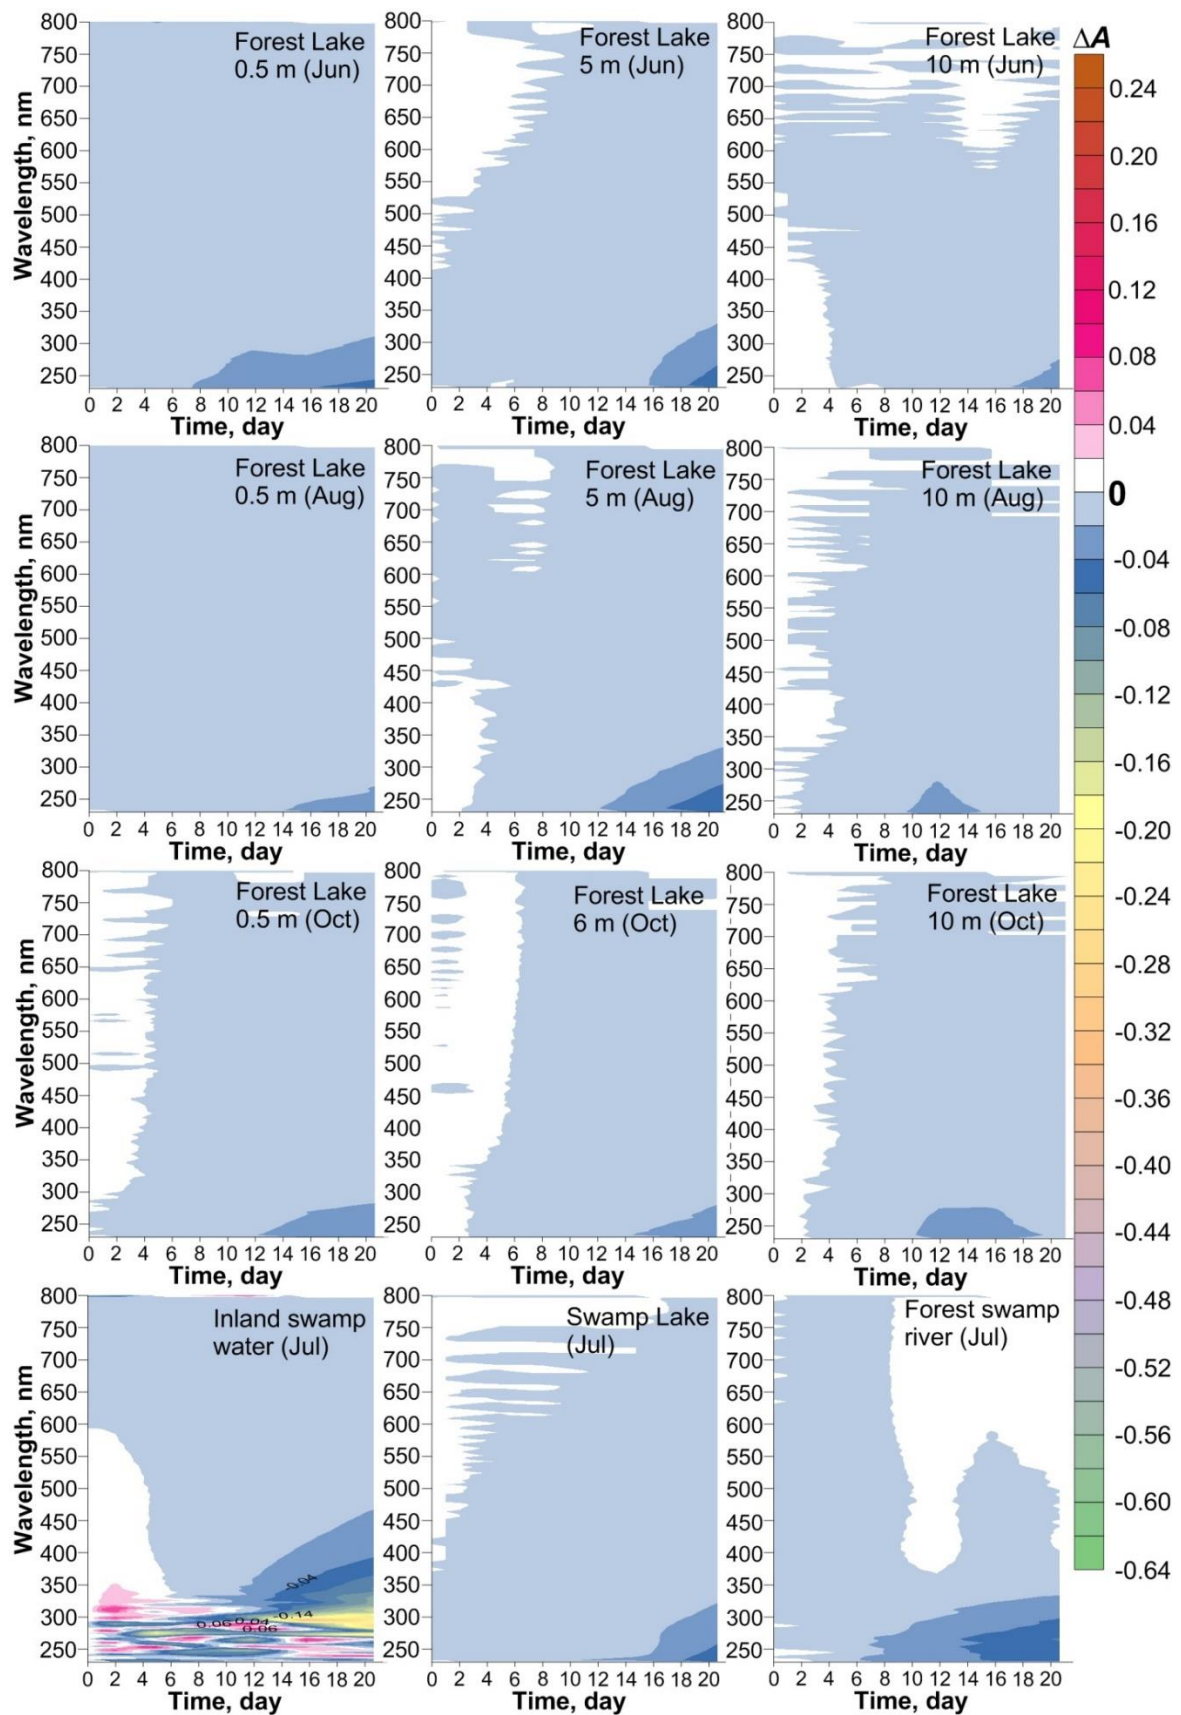

**Fig. S4.** Continuous optical spectra changes in the course of biodegradation experiments.



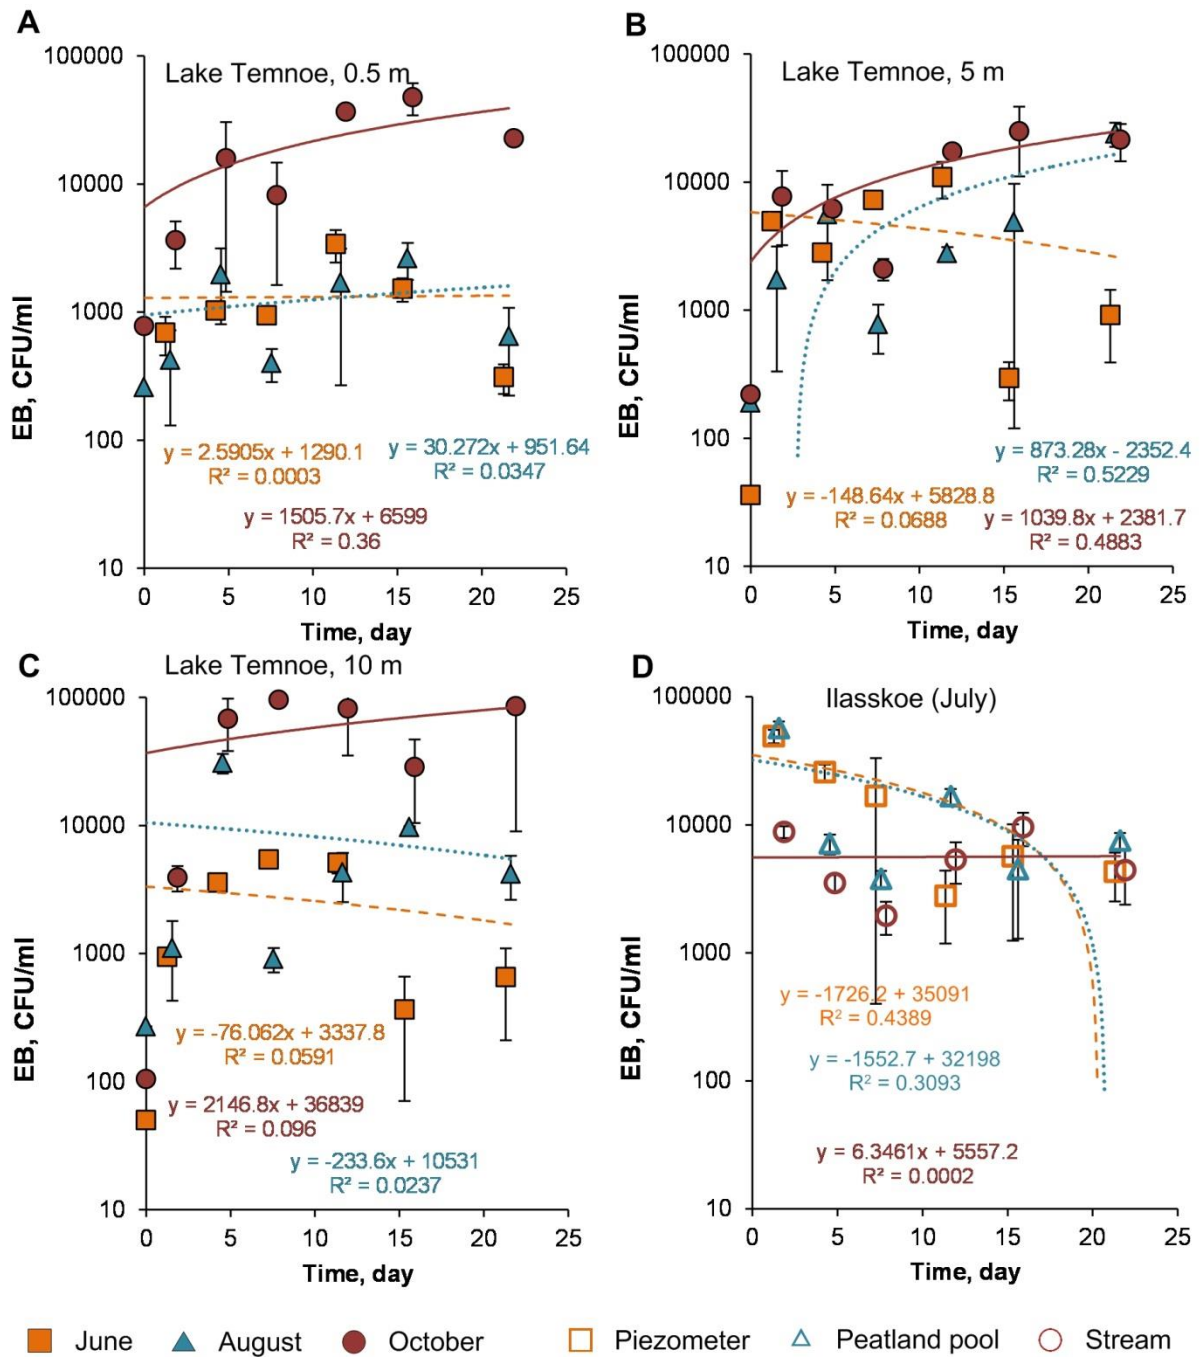

**Fig. S5.** Results on eutrophic bacterial counts in bio-degradation experiments. Lake Temnoe 0.5 m (A), 5 m (B) and 10 m (C) in June (squares), August (triangles) and October (circles). Ilasskoe Bog continuum in July (D) includes piezometer (squares), peatland pool Severnoe (triangles) and stream Chernyi (circles).

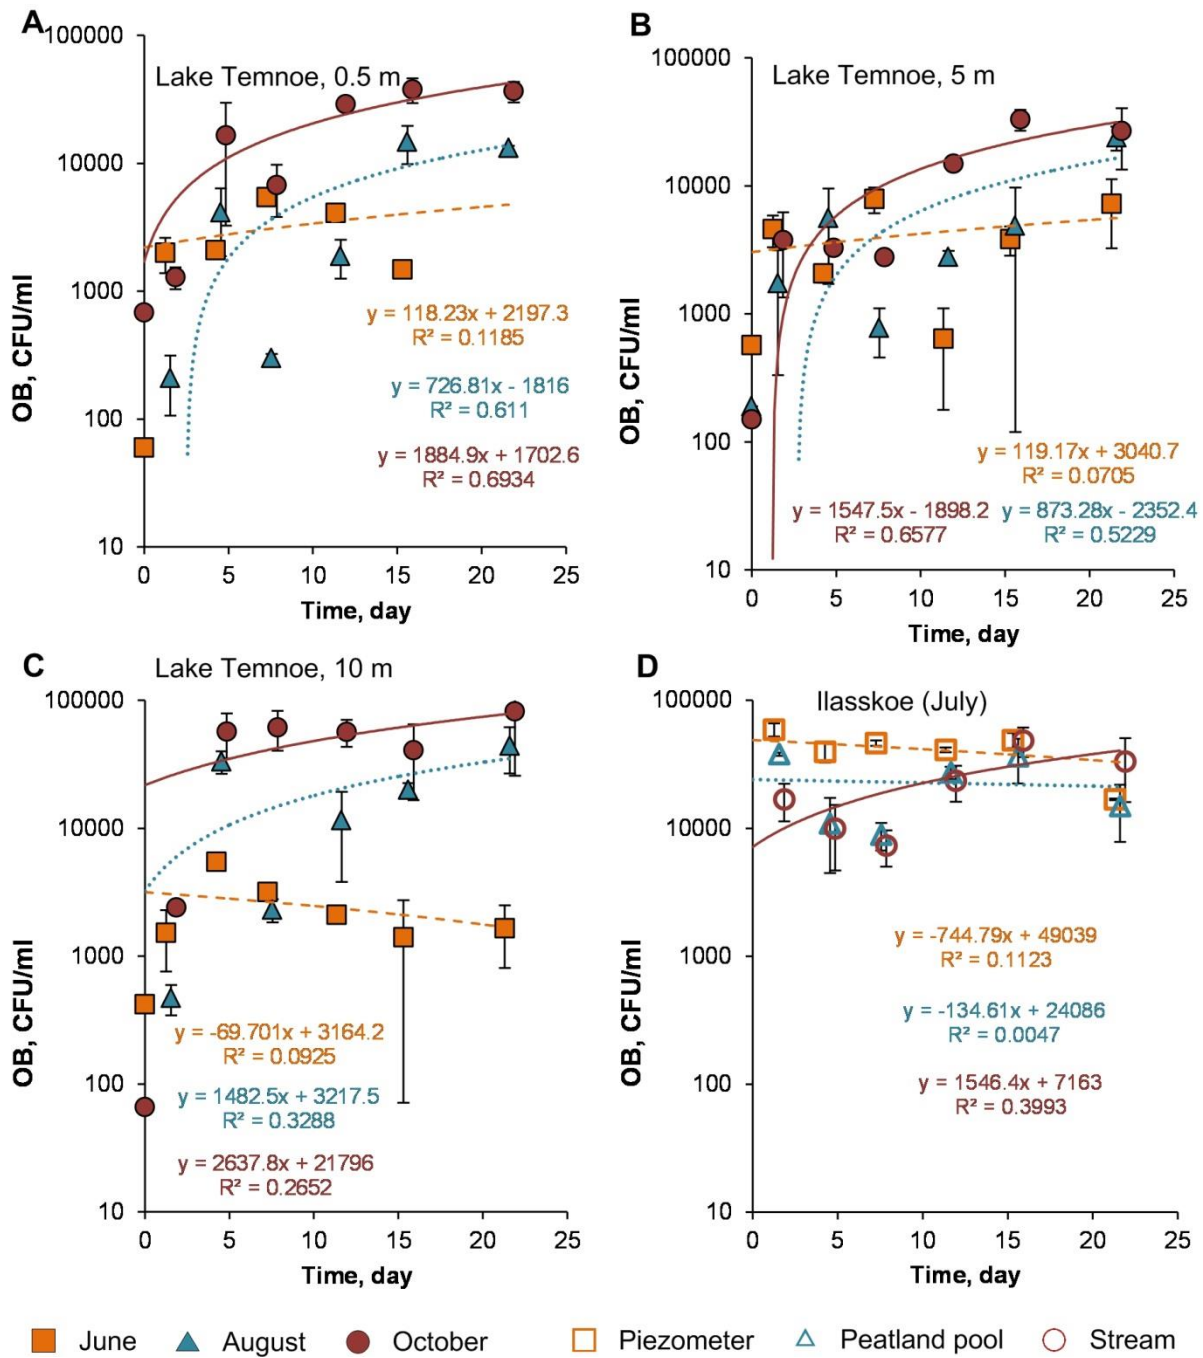

**Fig S5**, continued. Results on oligotrophic bacterial counts in bio-degradation experiments. Lake Temnoe 0.5 m (A), 5 m (B) and 10 m (C) in June (squares), August (triangles) and October (circles). Ilasskoe continuum in July (D) includes piezometer (squares), peatland pool Severnoe (triangles) and stream Chernyi (circles).

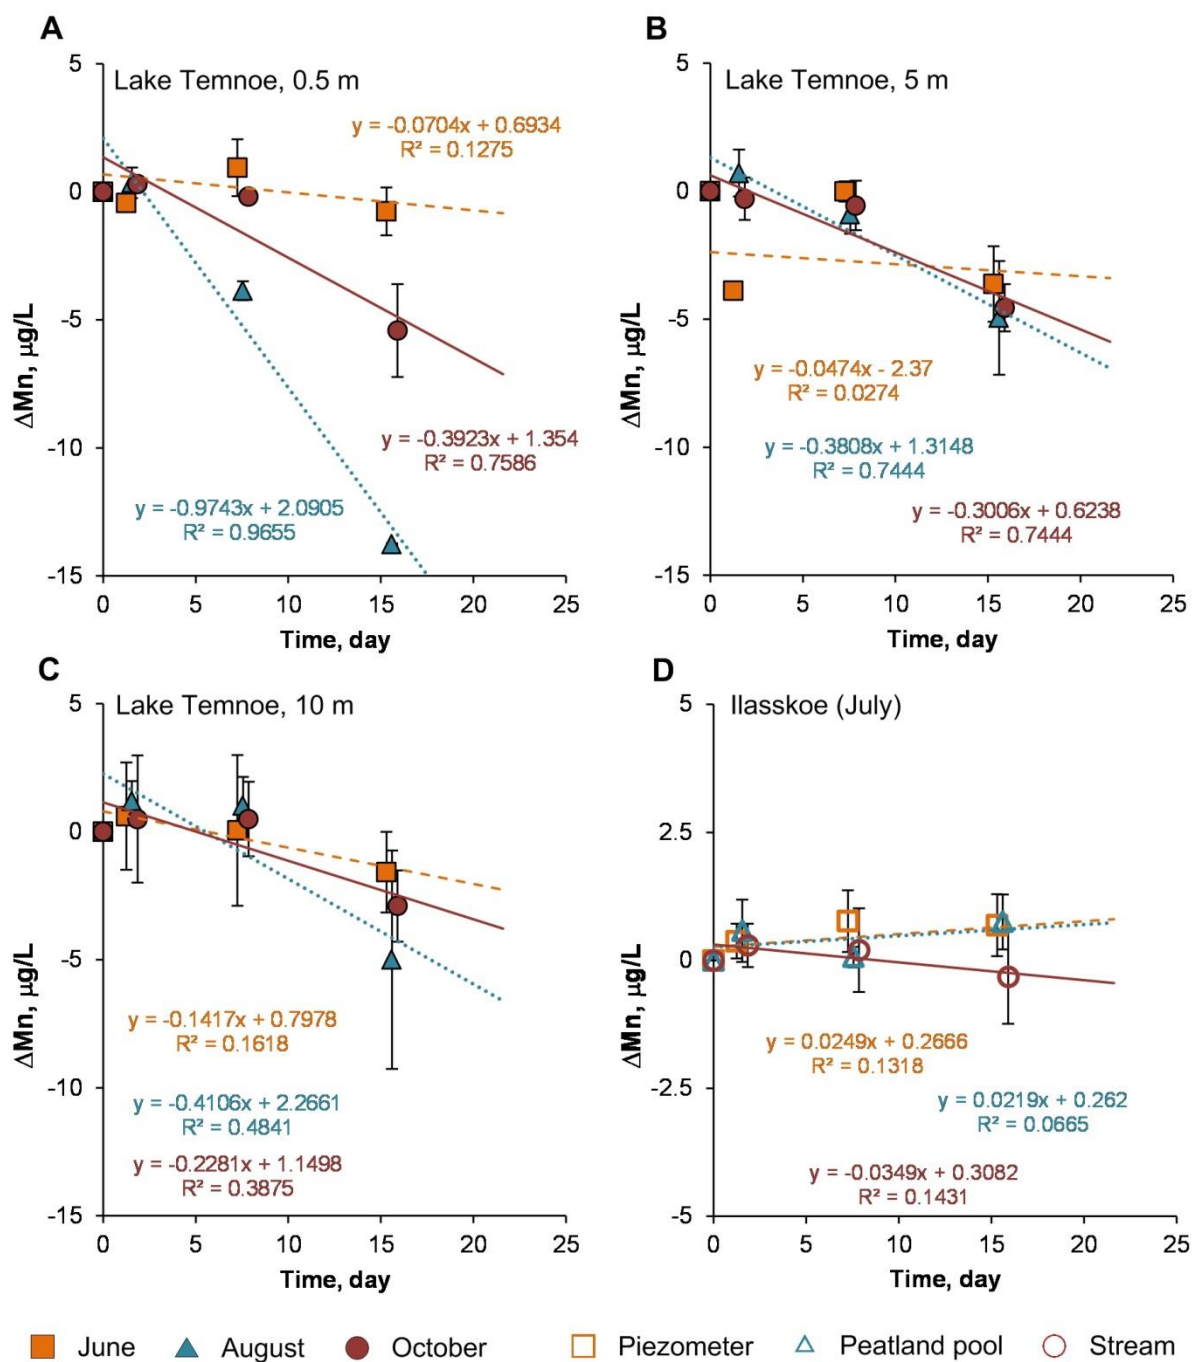

**Fig. S6.** Change in Mn concentration (relative to the control) over time in bio-degradation experiments. The error bars are 1 s.d. of duplicates. Lake Temnoe 0.5 m (A), 5 m (B) and 10 m (C) in June (squares), August (triangles) and October (circles). Ilasskoe continuum in July (D) includes piezometer (squares), peatland pool Severnoe (triangles) and stream Chernyi (circles)

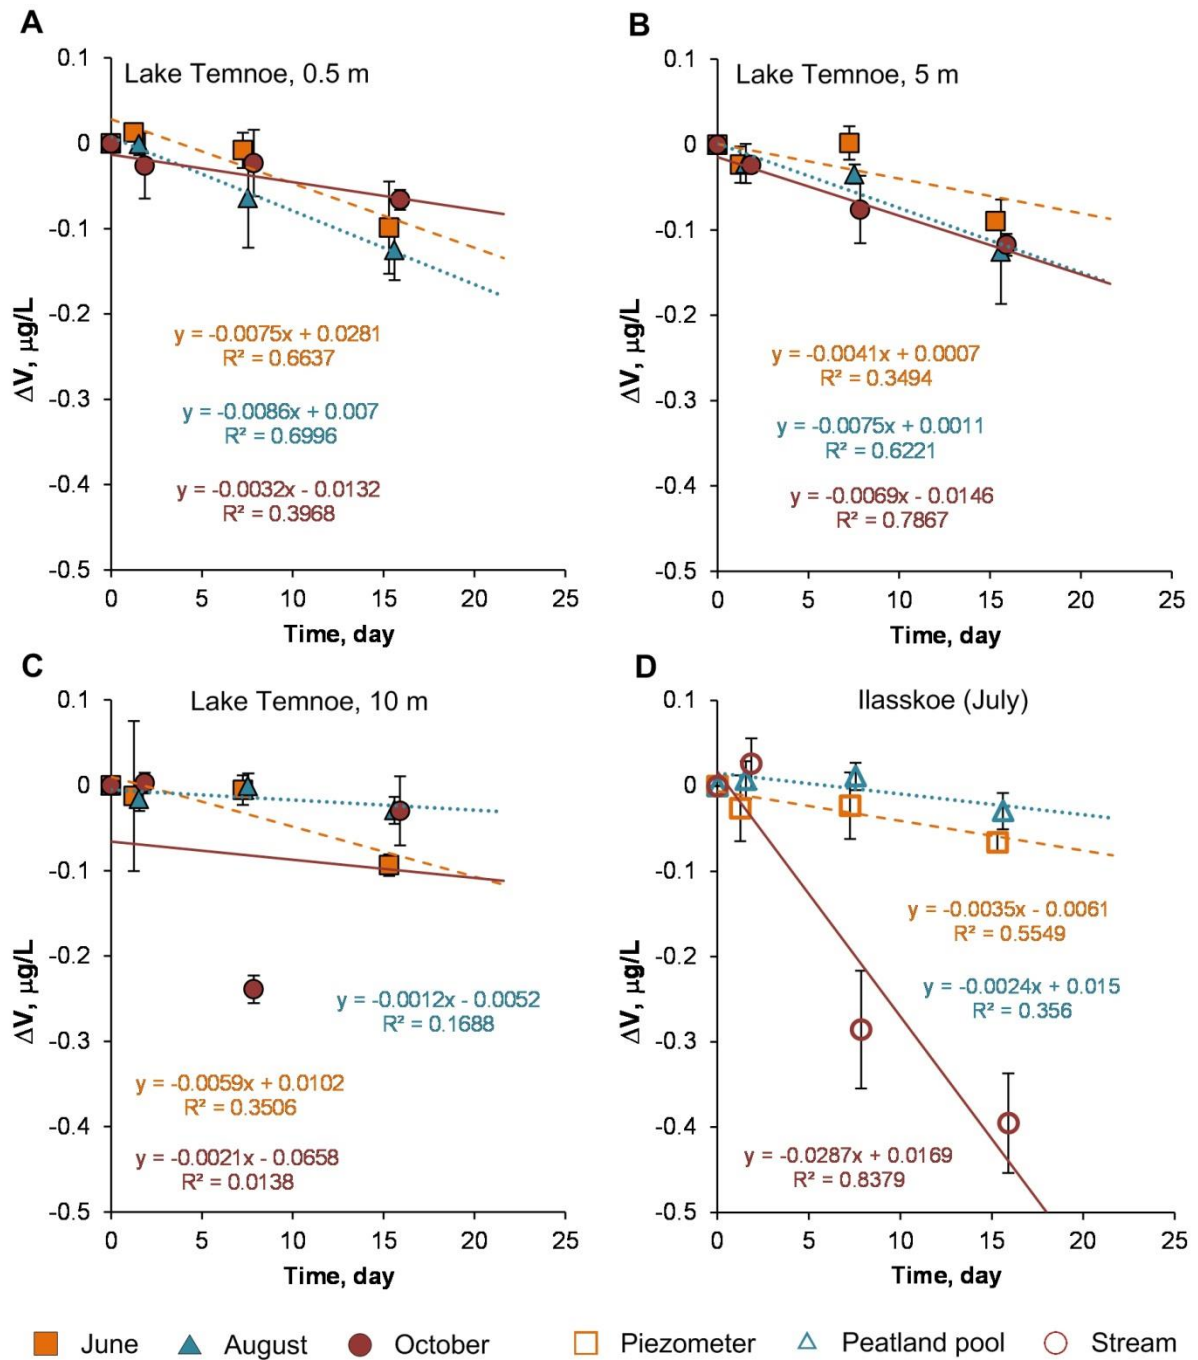

**Fig. S7.** Change in V concentration (relative to the control) over time in bio-degradation experiments. The error bars are 1 s.d. of duplicates. Lake Temnoe 0.5 m (A), 5 m (B) and 10 m (C) in June (squares), August (triangles) and October (circles). Ilasskoe continuum in July (D) includes piezometer (squares), peatland pool Severnoe (triangles) and stream Chernyi (circles)

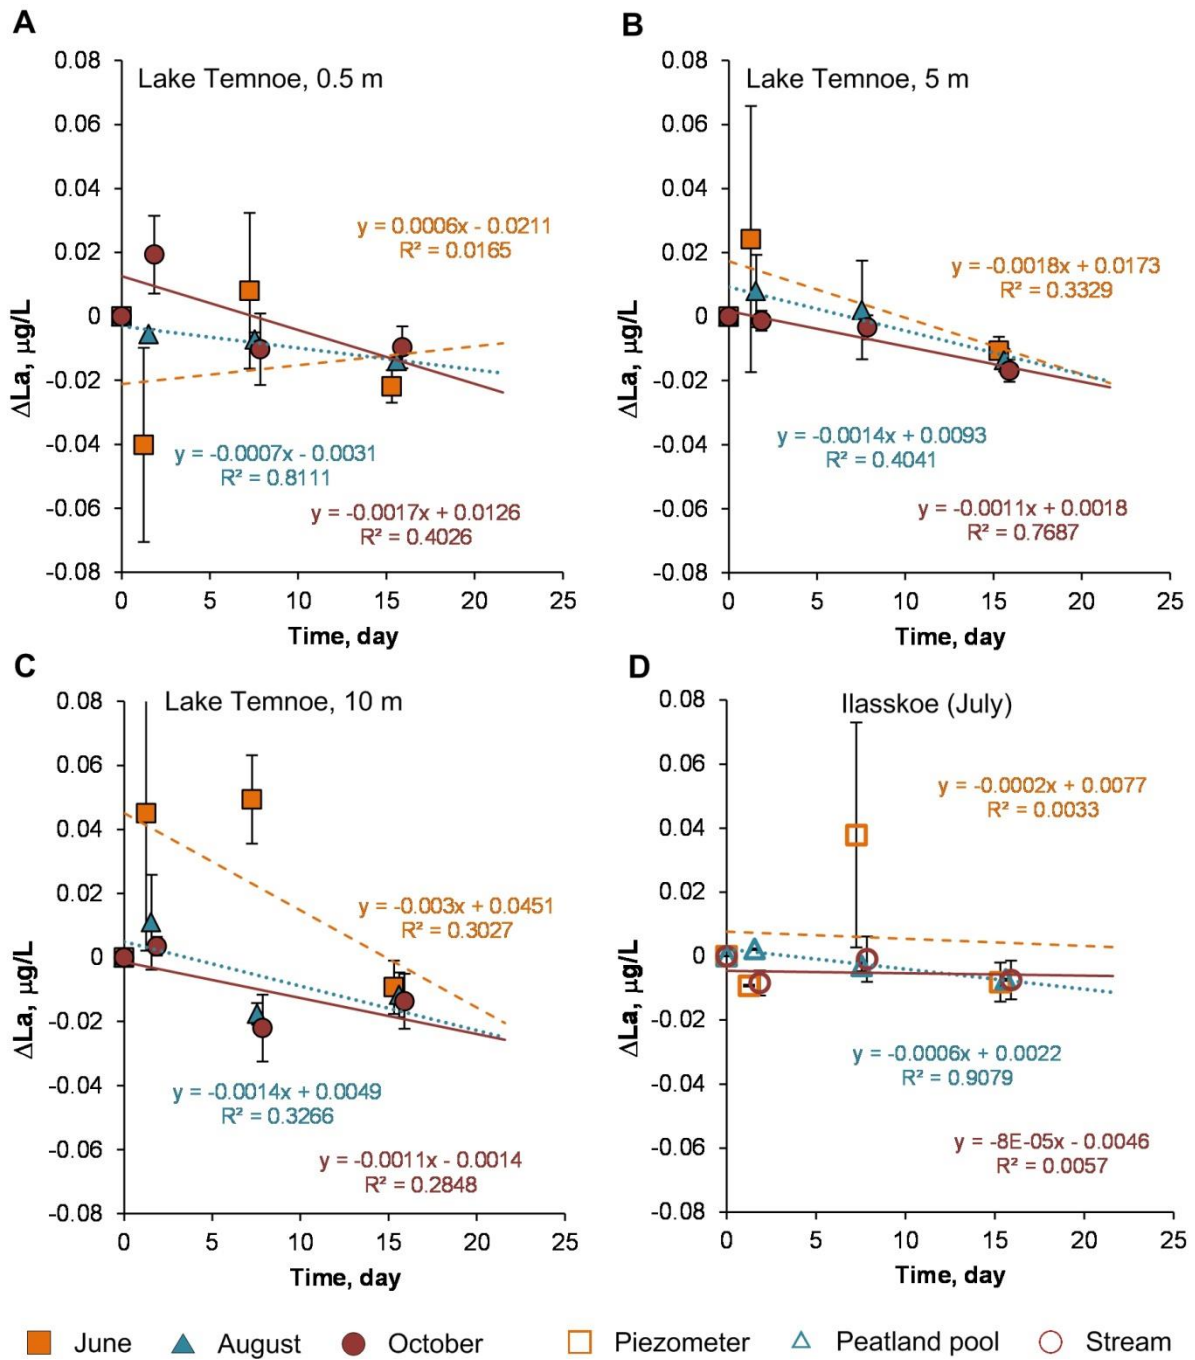

**Fig. S8.** Change in La concentration (relative to the control) over time in bio-degradation experiments. The error bars are 1 s.d. of duplicates. Lake Temnoe 0.5 m (A), 5 m (B) and 10 m (C) in June (squares), August (triangles) and October (circles). Ilasskoe continuum in July (D) includes piezometer (squares), peatland pool Severnoe (triangles) and stream Chernyi (circles)



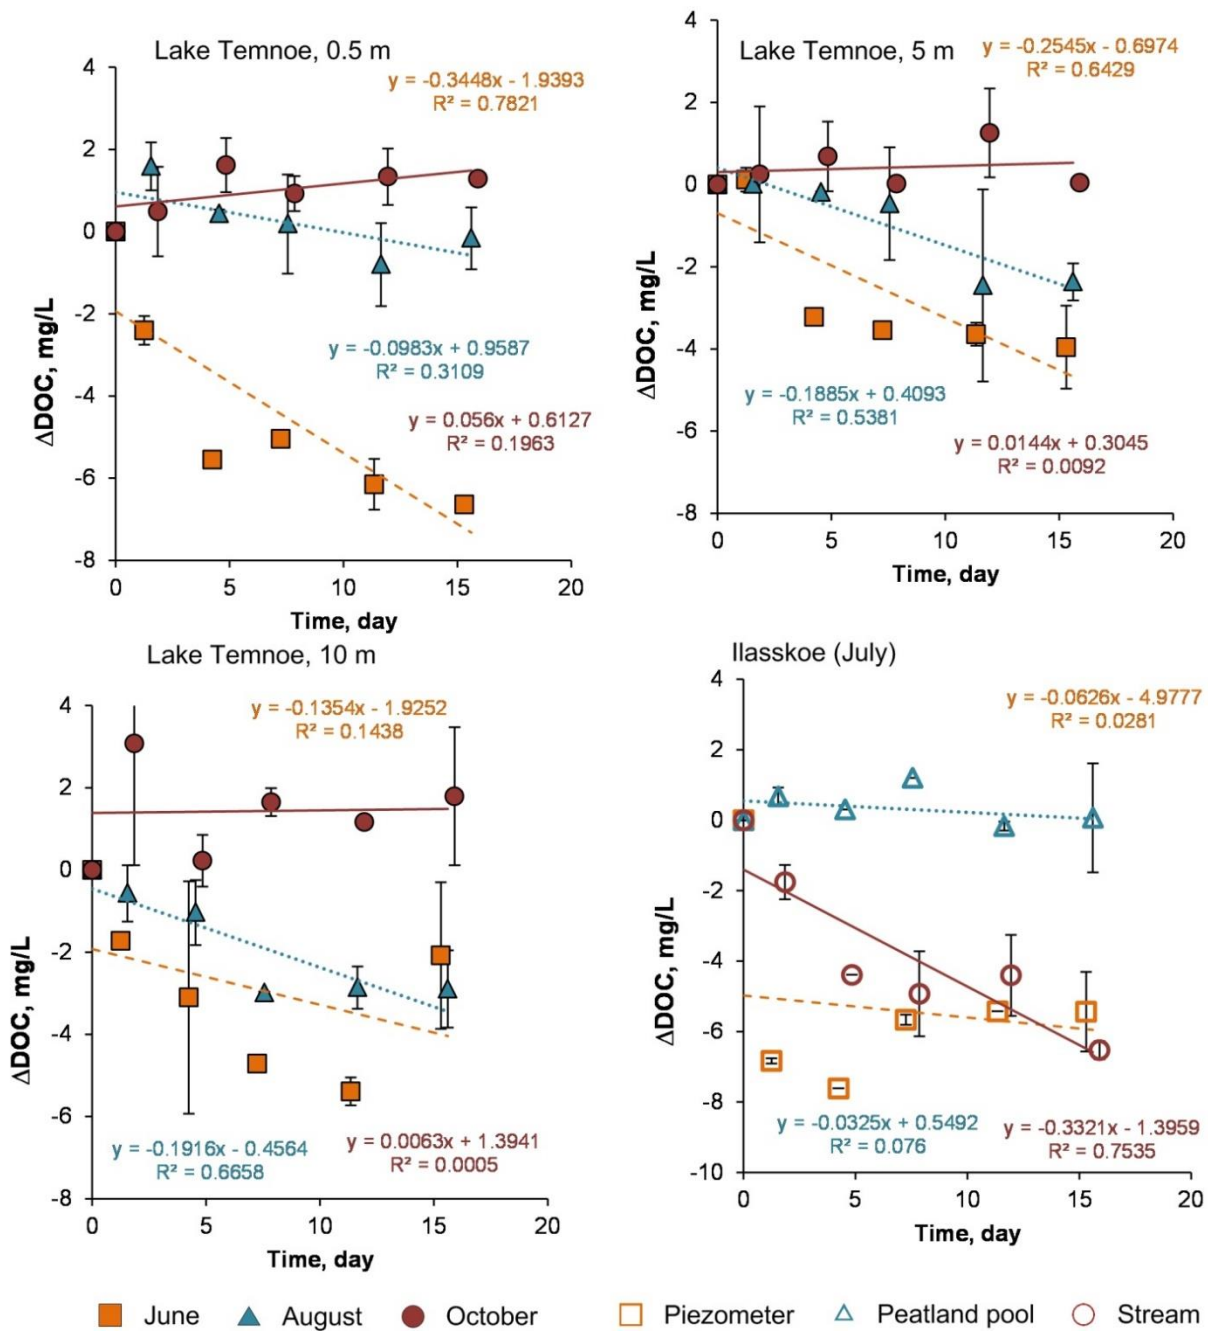

**Fig. S9.** The change of DOC concentration over time in photodegradation experiments. The error bars represent 1 s.d. of duplicates. Lake Temnoe 0.5 m (A), 5 m (B) and 10 m (C) in June (squares), August (triangles) and October (circles). Ilasskoe continuum in July (D) includes piezometer (open squares), peatland pool Severnoe (open triangles) and stream Chernyi (open circles).

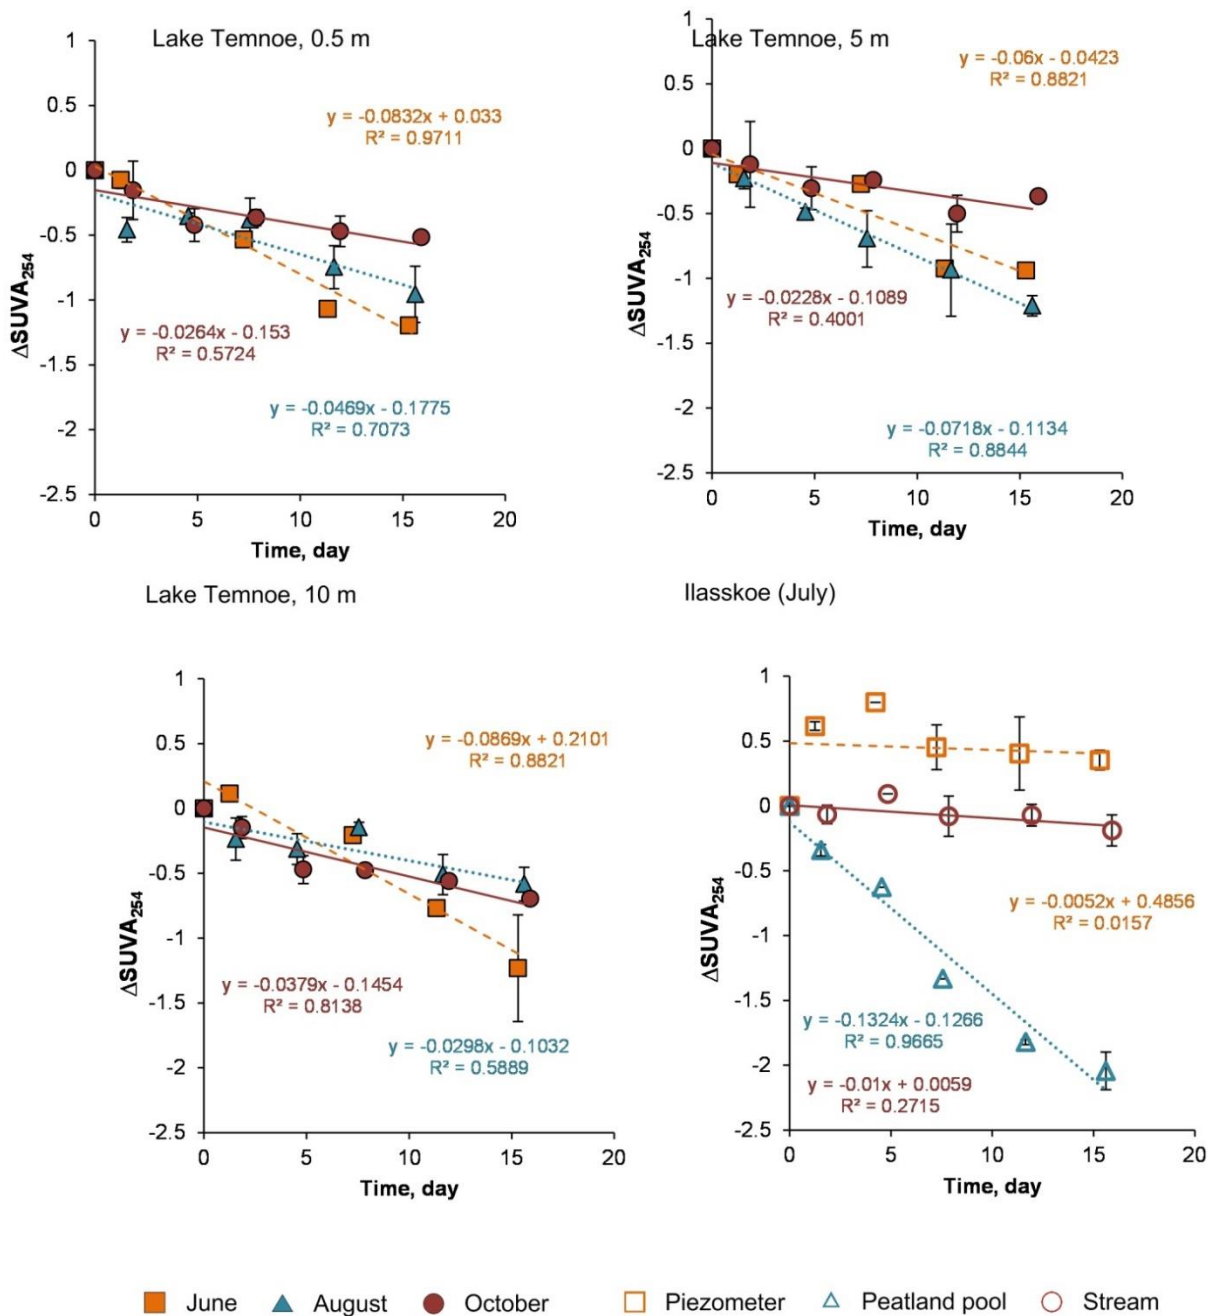

**Fig. S10.** The change of  $SUVA_{254}$  (relative to the control) over time in photodegradation experiments. Lake Temnoe 0.5 m (A), 5 m (B) and 10 m (C) in June (squares), August (triangles) and October (circles). Ilasskoe continuum in July (D) includes piezometer (squares), peatland pool Severnoe (triangles) and stream Chernyi (circles).

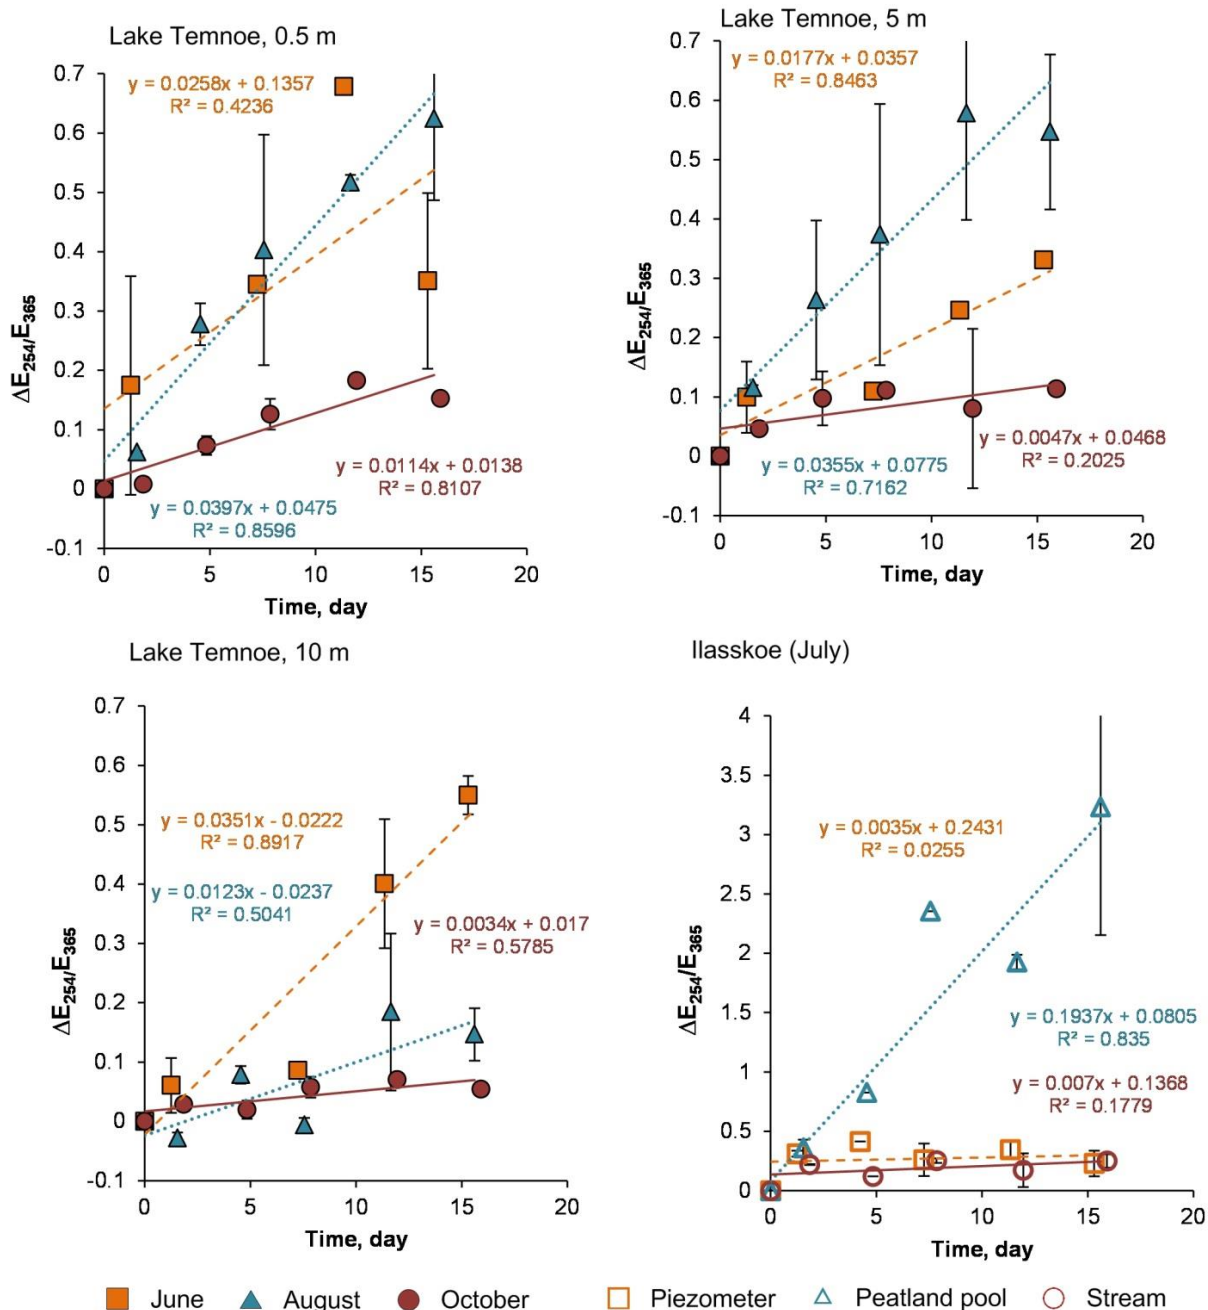

**Fig. S11.** The change of optical ratios ( $E_{254}/E_{365}$ ) over time in photodegradation experiments. Lake Temnoe 0.5 m (A), 5 m (B) and 10 m (C) in June (squares), August (triangles) and October (circles). Ilasskoe continuum in July (D) includes piezometer (squares), peatland pool Severnoe (triangles) and stream Chernyi (circles)

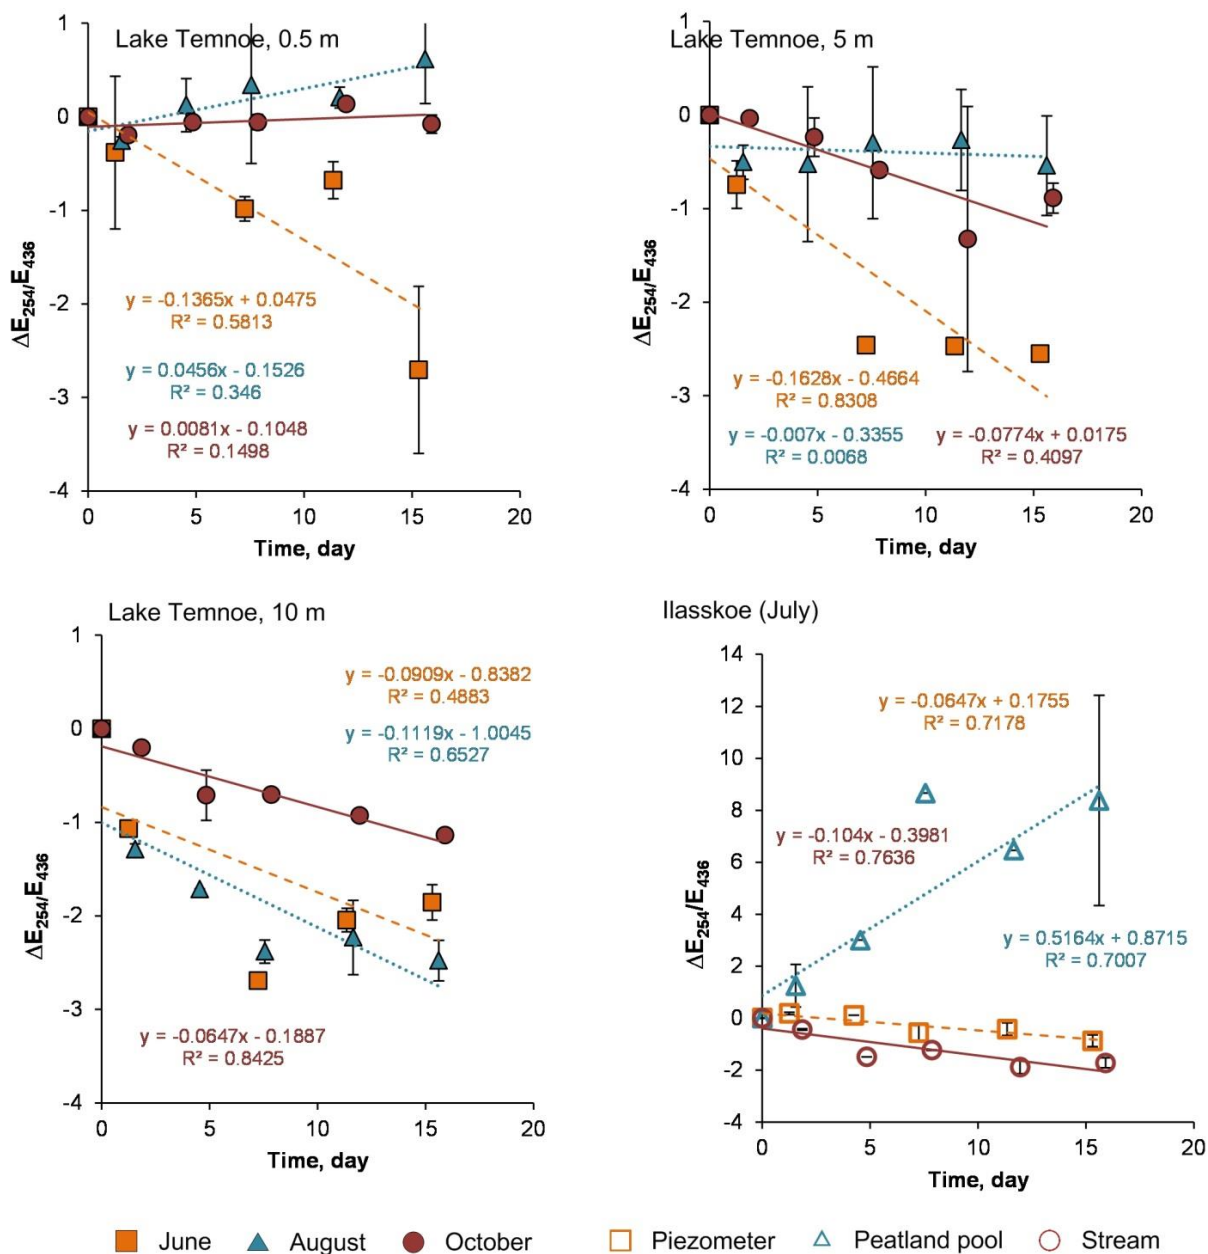

**Fig. S11**, continued. The change of optical ratios ( $E_{254}/E_{436}$ ) over time in photodegradation experiments. Lake Temnoe 0.5 m (A), 5 m (B) and 10 m (C) in June (squares), August (triangles) and October (circles). Ilasskoe continuum in July (D) includes piezometer (squares), peatland pool Severnoe (triangles) and stream Chernyi (circles)

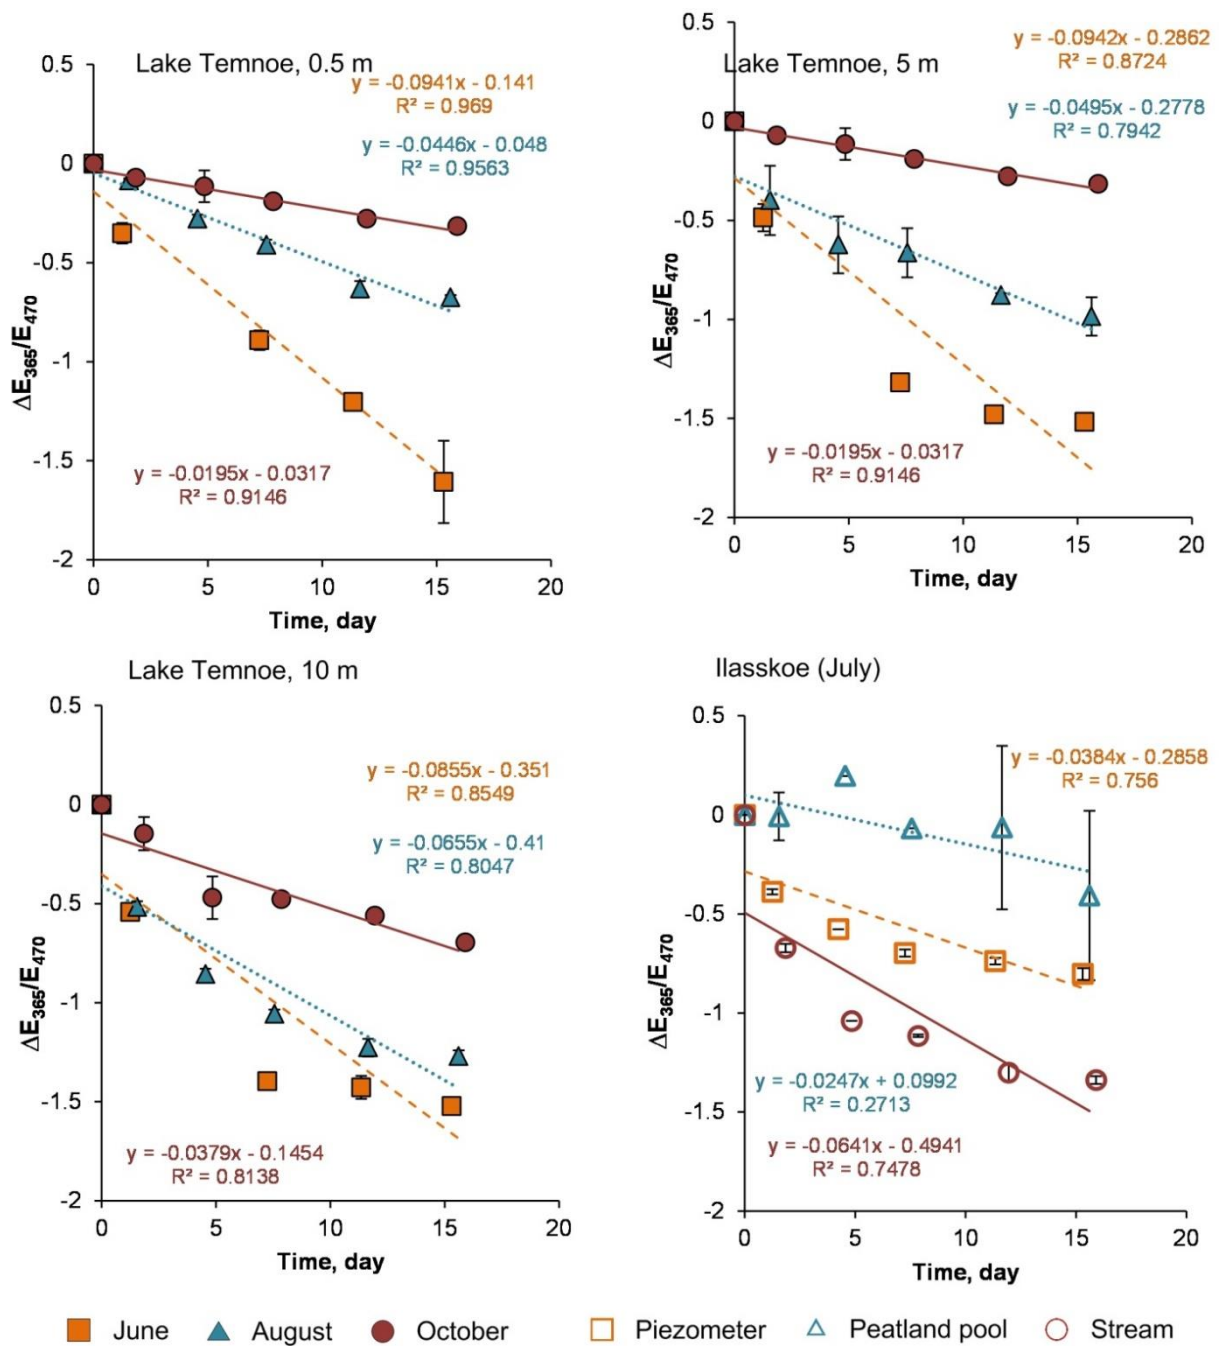

**Fig. S11, continued.** The change of optical ratios ( $E_{365}/E_{470}$ ) over time in photodegradation experiments. Lake Temnoe 0.5 m (A), 5 m (B) and 10 m (C) in June (squares), August (triangles) and October (circles). Ilaskoe continuum in July (D) includes piezometer (squares), peatland pool Severnoe (triangles) and stream Chernyi (circles)



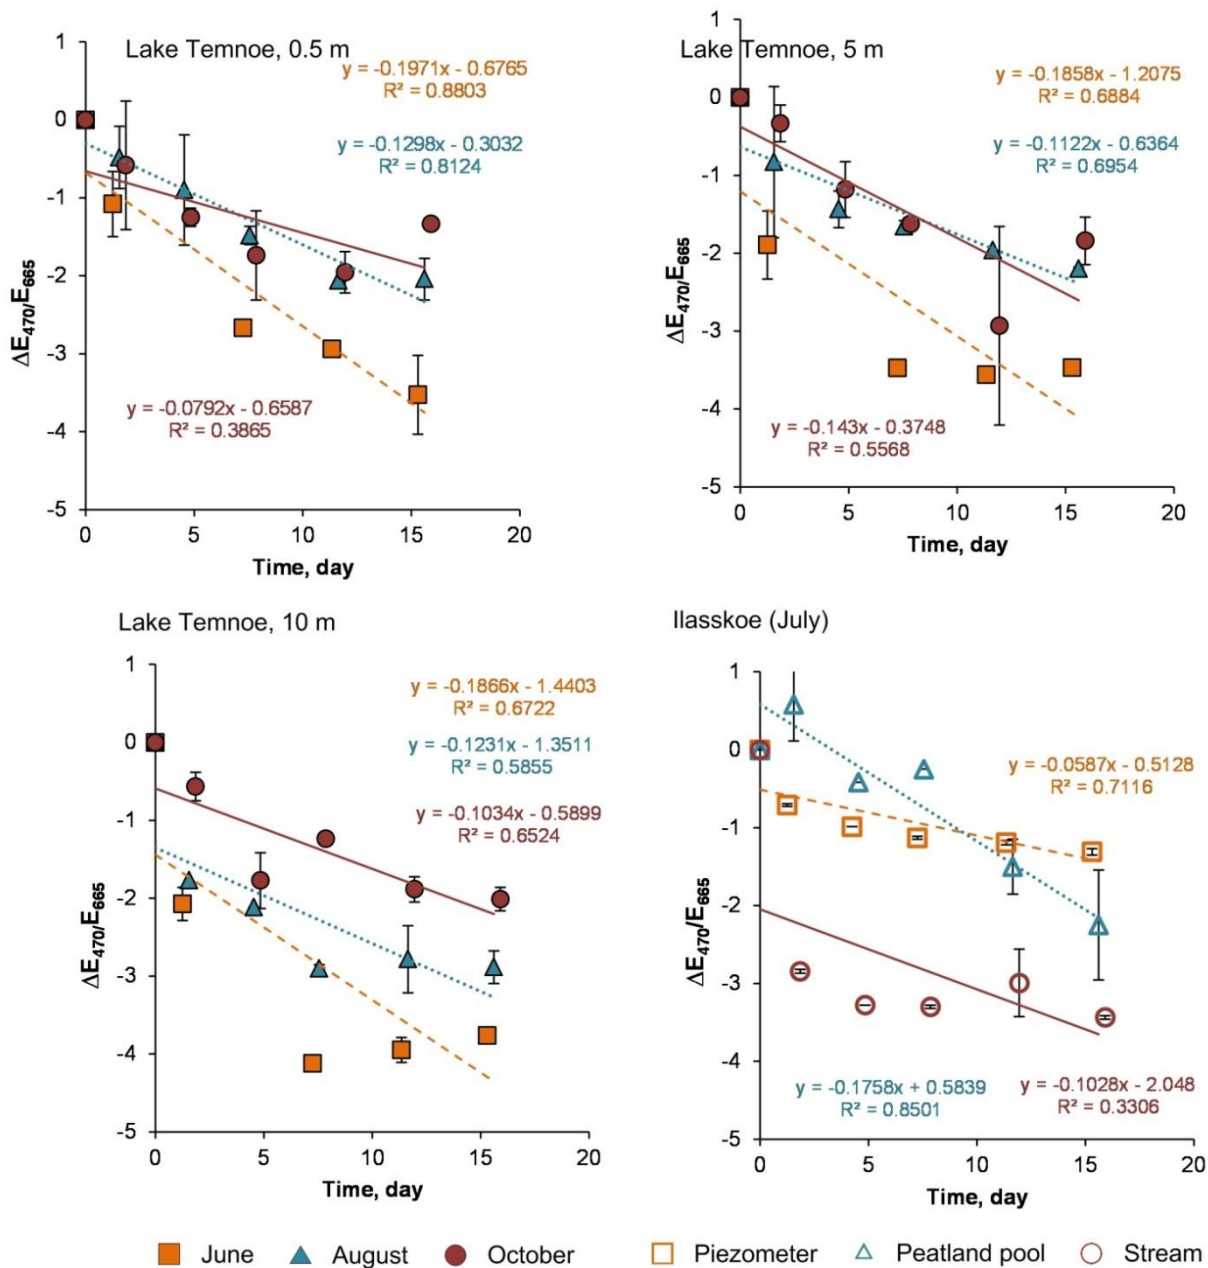

**Fig. S11**, continued. The change of optical ratios ( $E_{470}/E_{665}$ ) over time in photodegradation experiments. Lake Temnoe 0.5 m (A), 5 m (B) and 10 m (C) in June (squares), August (triangles) and October (circles). Illasskoe continuum in July (D) includes piezometer (squares), peatland pool Severnoe (triangles) and stream Chernyi (circles)

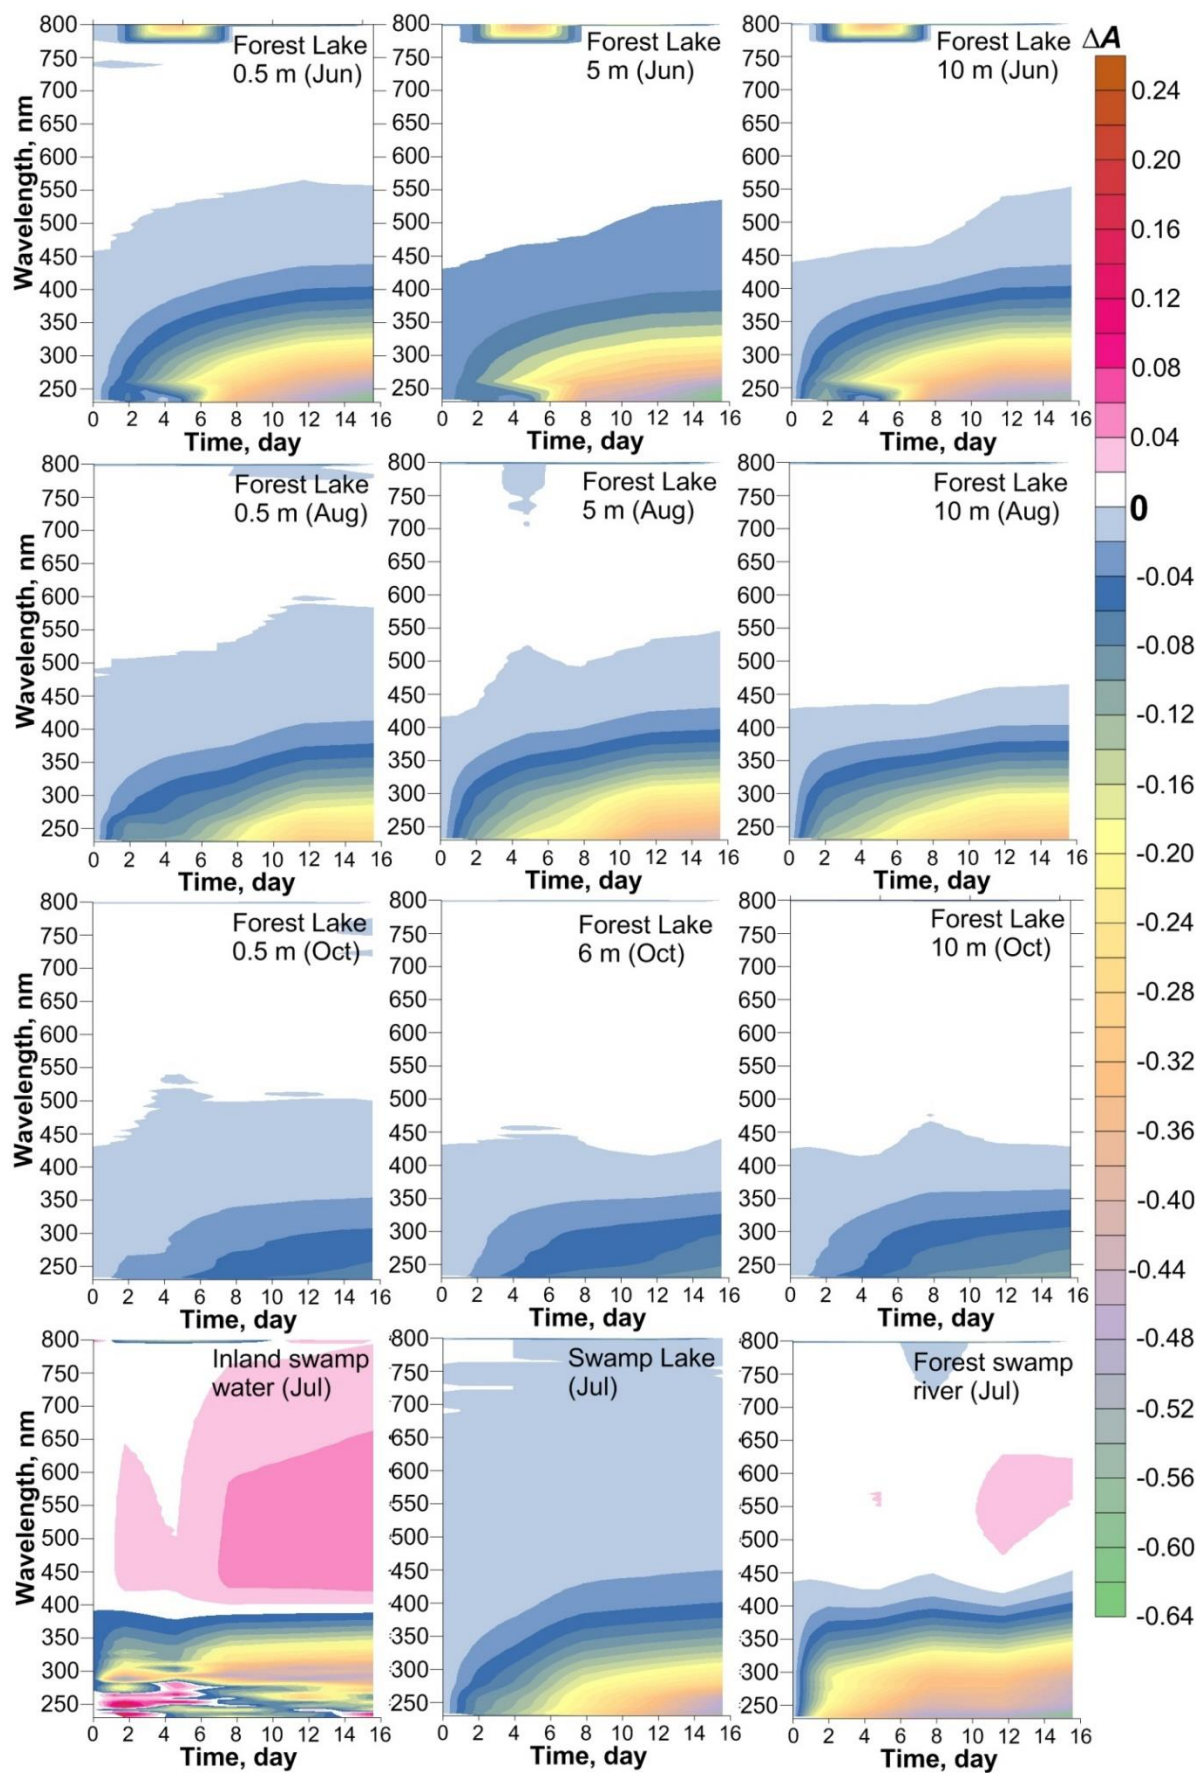

**Fig. S12.** Continuous optical spectra changes in the course of photodegradation experiments

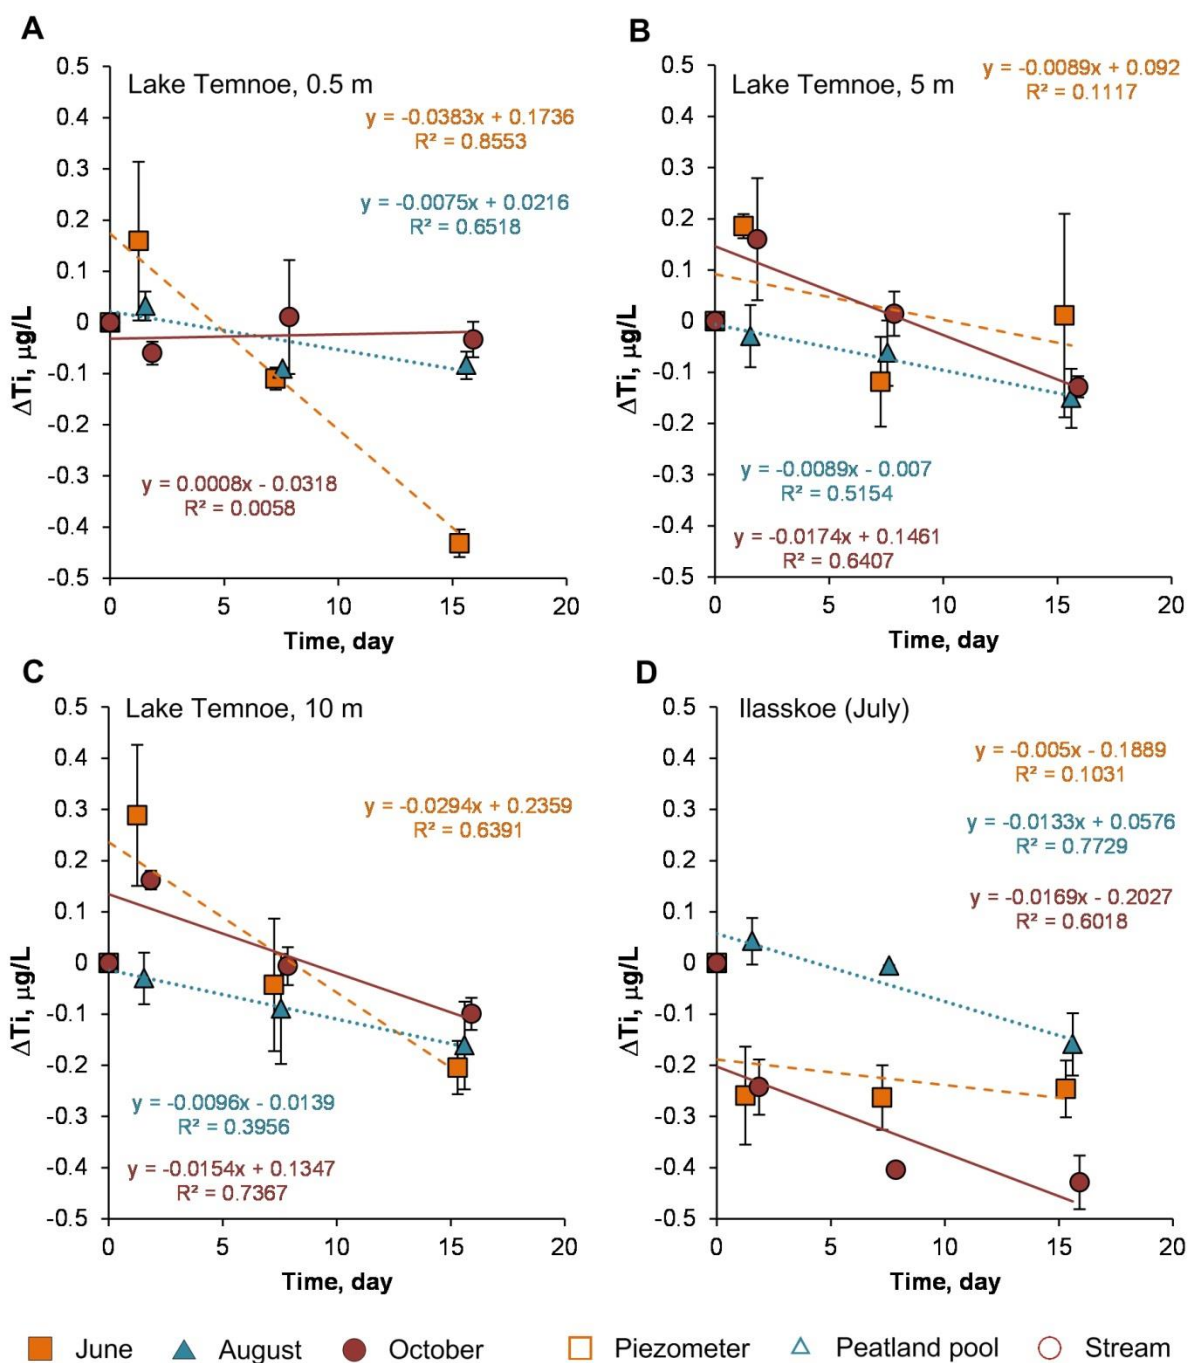

**Fig. S13.** Change in Ti concentration (relative to the control) over time in photodegradation experiments. The error bars are 1 s.d. of duplicates. Lake Temnoe 0.5 m (A), 5 m (B) and 10 m

(C) in June (squares), August (triangles) and October (circles). Ilasskoe continuum in July (D) includes piezometer (squares), peatland pool Severnoe (triangles) and stream Chernyi (circles)

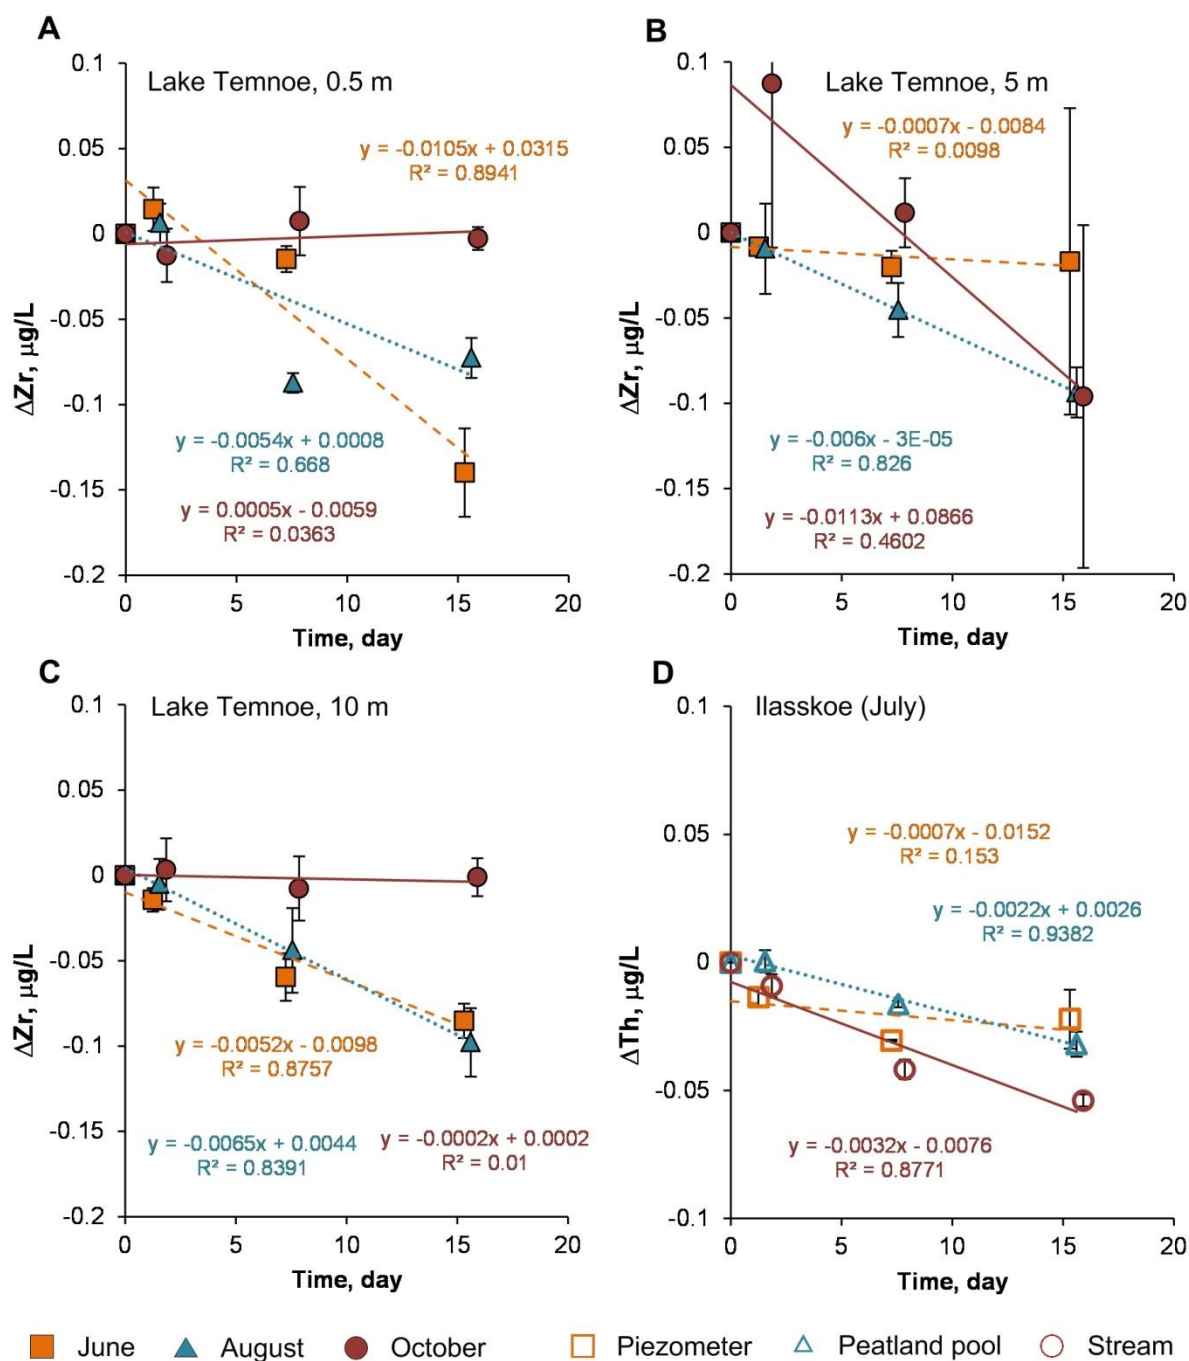

**Fig. S14.** Change in Zr concentration (relative to the control) over time in photodegradation experiments. The error bars are 1 s.d. of duplicates. Lake Temnoe 0.5 m (A), 5 m (B) and 10 m (C) in June (squares), August (triangles) and October (circles). Ilasskoe continuum in July (D) includes piezometer (squares), peatland pool Severnoe (triangles) and stream Chernyi (circles)
